# Supplementary material for: SF5- and SCF3-substituted tetrahydroquinoline compounds as potent bactericidal agents against multidrug-resistant persister Gram-positive bacteria
Source: Royal Society of Chemistry journal article supplement (doi:10.1039/d1md00211b), 2021-01-01

## *Supplementary Information*

### **SF<sub>5</sub> and SCF<sub>3</sub>-substituted tetrahydroquinoline compounds as potent bactericidal agents against multidrug resistant persister Gram-positive bacteria**

Kenneth I. Onyedibe<sup>1,3</sup>, Neetu Dayal<sup>1</sup>, Herman O. Sintim\*<sup>1,2,3</sup>,

<sup>1</sup> Department of Chemistry, Purdue University, 560 Oval Drive, West Lafayette, Indiana 47907, United States

<sup>2</sup> Center for Drug Discovery, Purdue University, 720 Clinic Drive, West Lafayette, Indiana 47907, United States

<sup>3</sup> Purdue Institute of Inflammation, Immunology, and Infectious Disease, West Lafayette, IN, 47907, USA

\*Corresponding author. Email: [hsintim@purdue.edu](mailto:hsintim@purdue.edu)

# <sup>1</sup>H Spectra for Compound 1

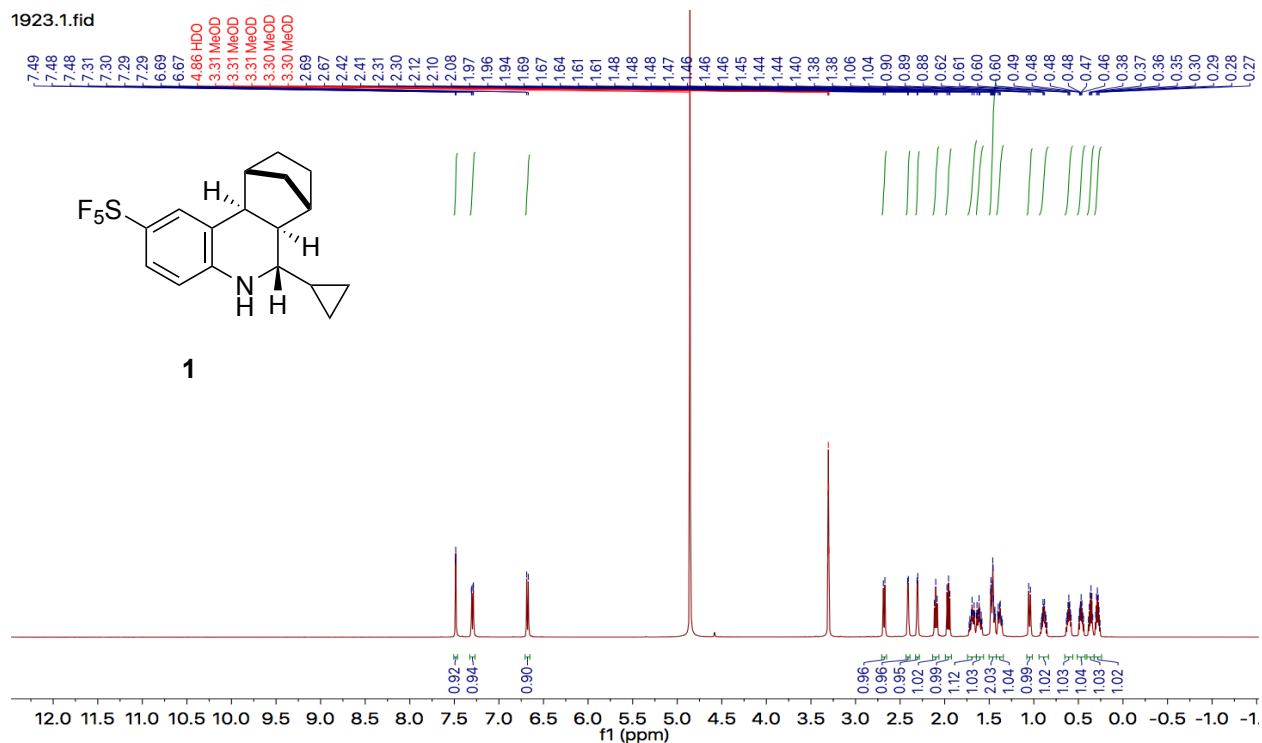

# <sup>13</sup>C Spectra for Compound 1

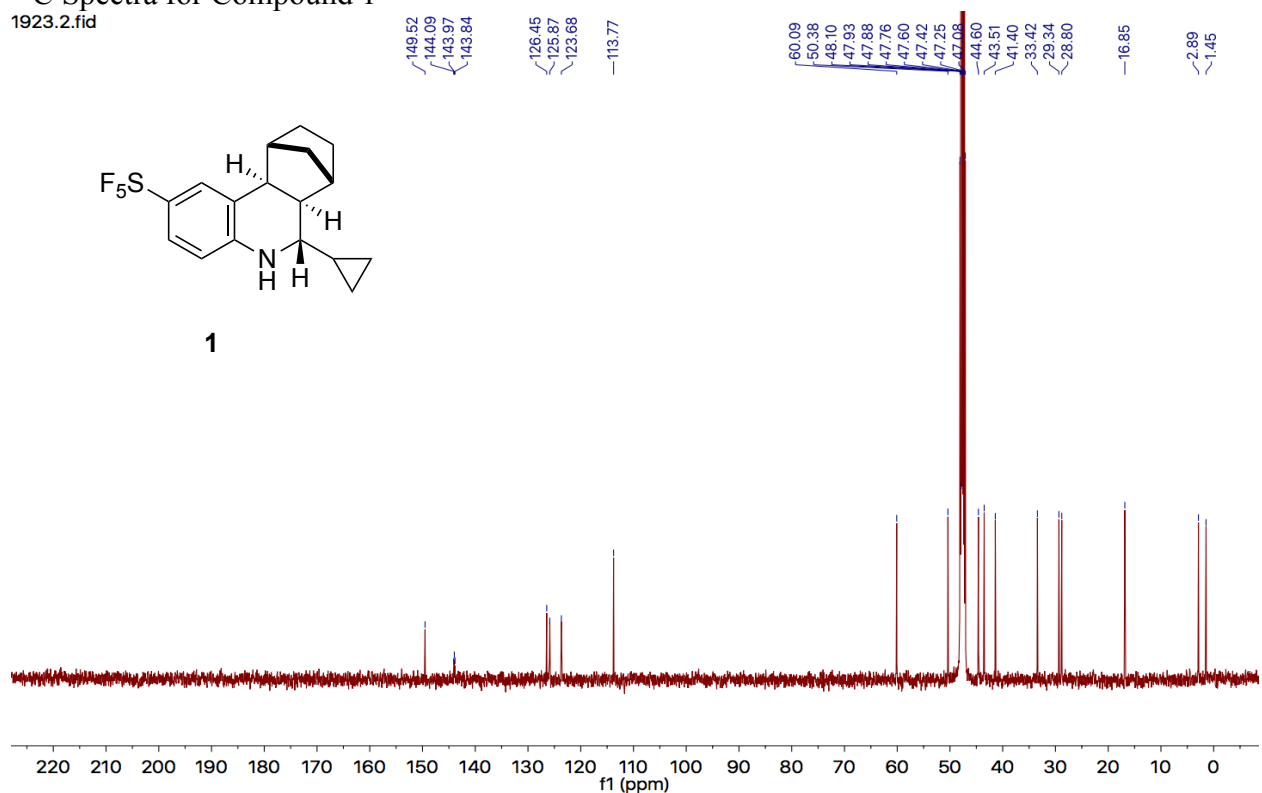

<sup>1</sup>H Spectra for Compound 2

1906.1.fid

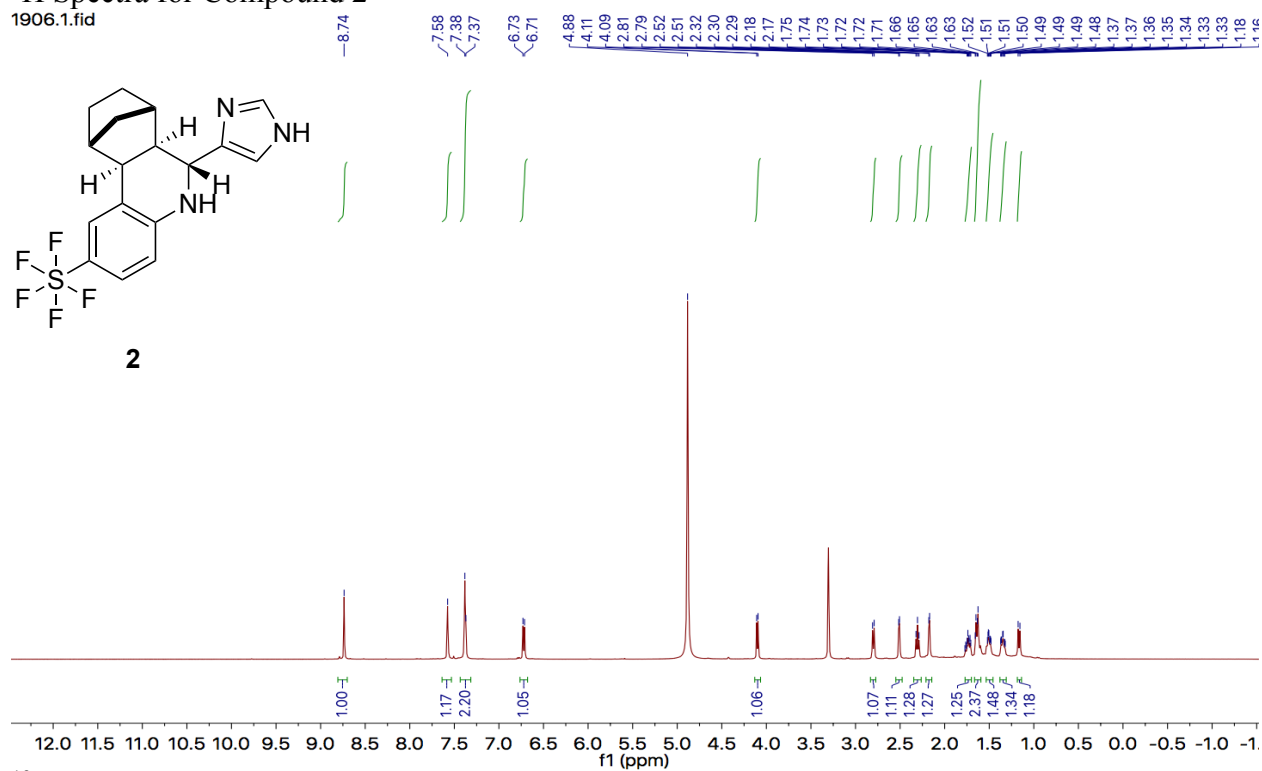

<sup>13</sup>C Spectra for Compound 2

1906.2.fid

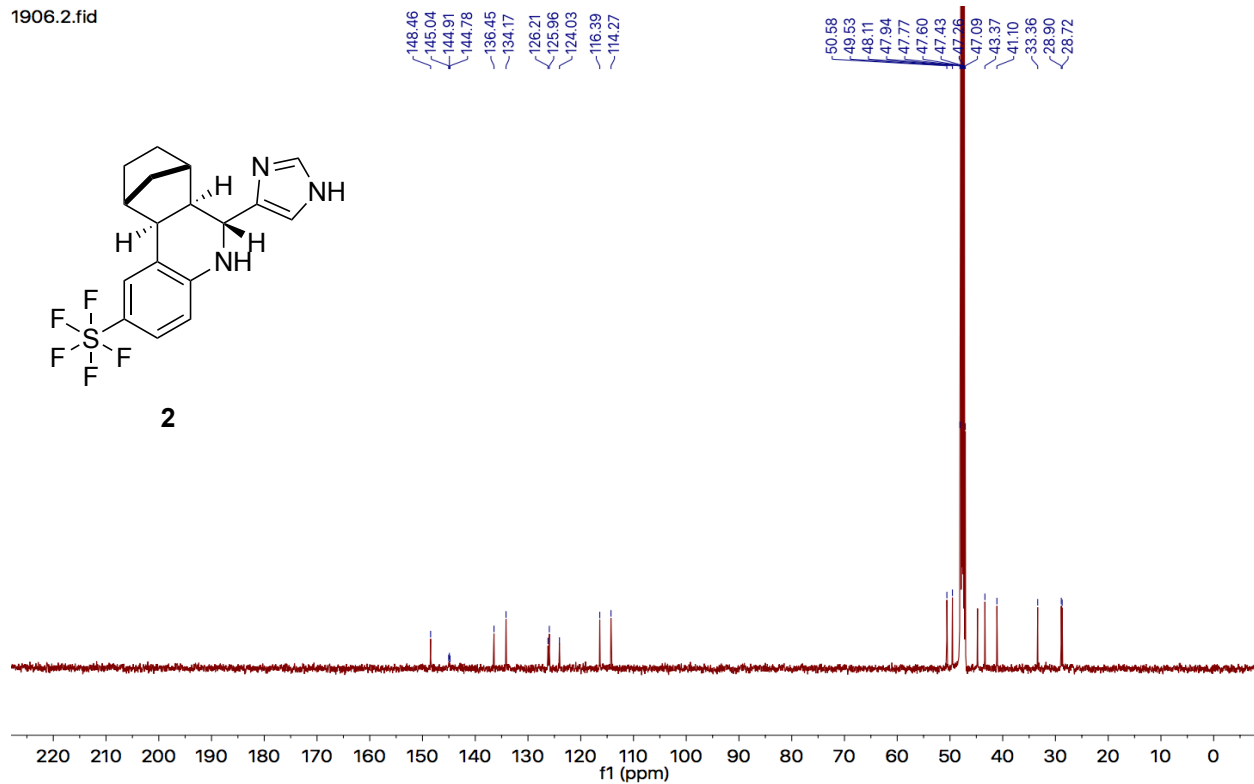

# <sup>1</sup>H Spectra for Compound 3

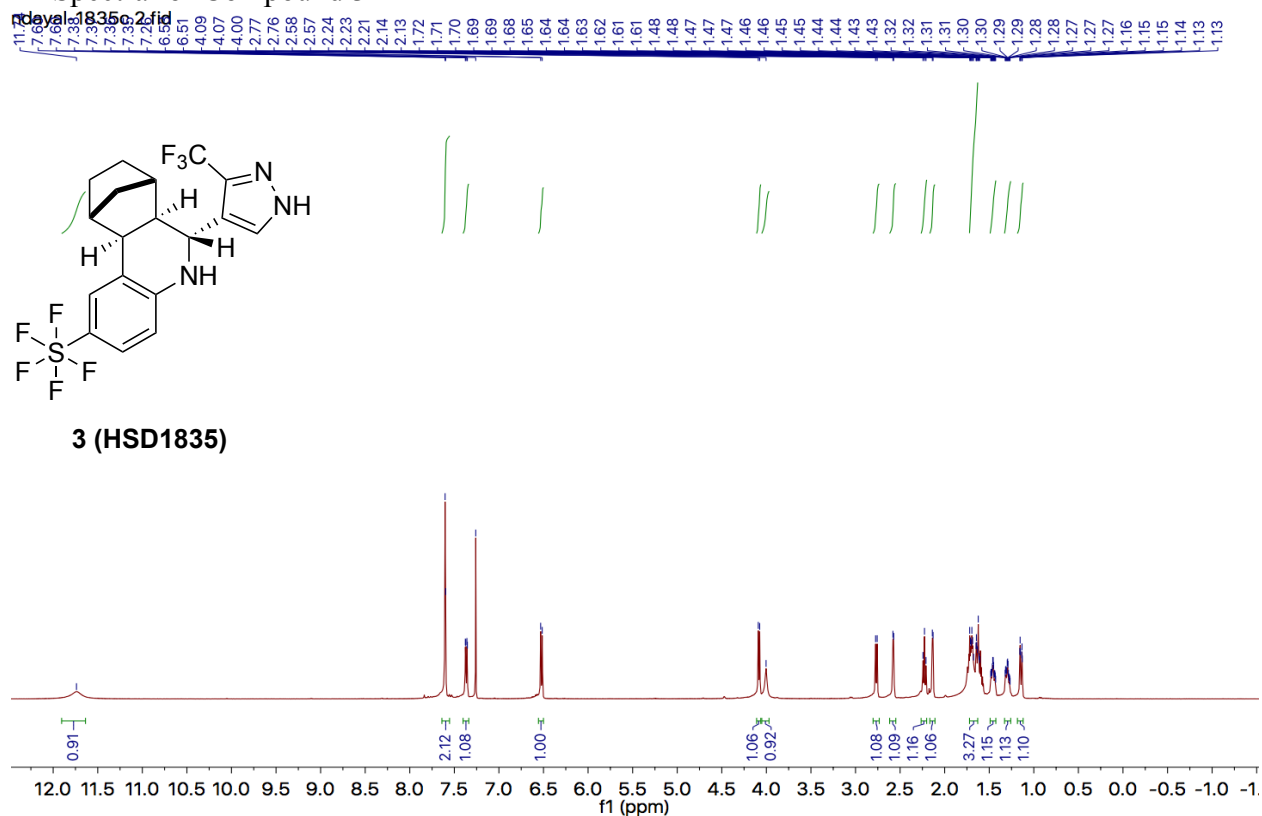

# <sup>13</sup>C Spectra for Compound 3

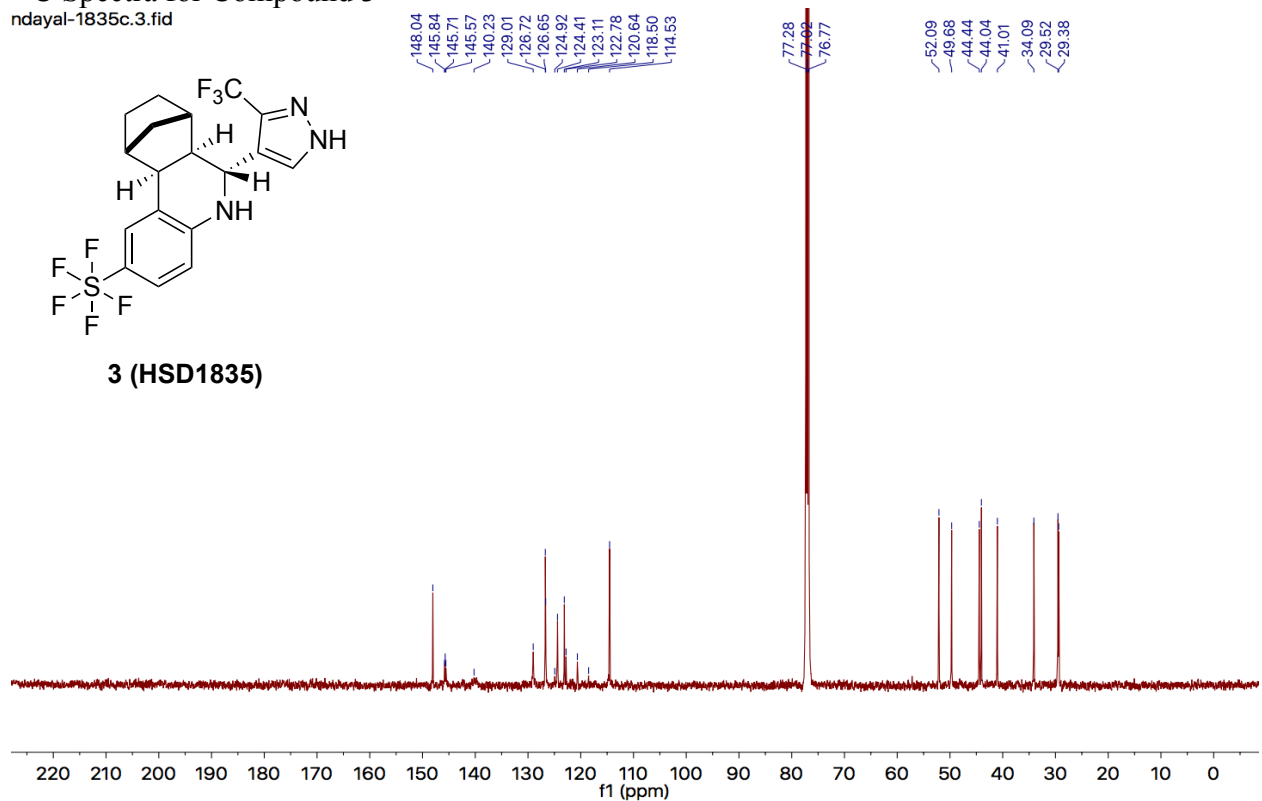

# <sup>19</sup>F Spectra for Compound 3

ndayal-1835c.5.fid

---61.02

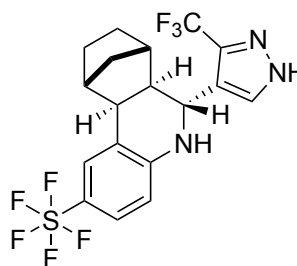

**3 (HSD1835)**

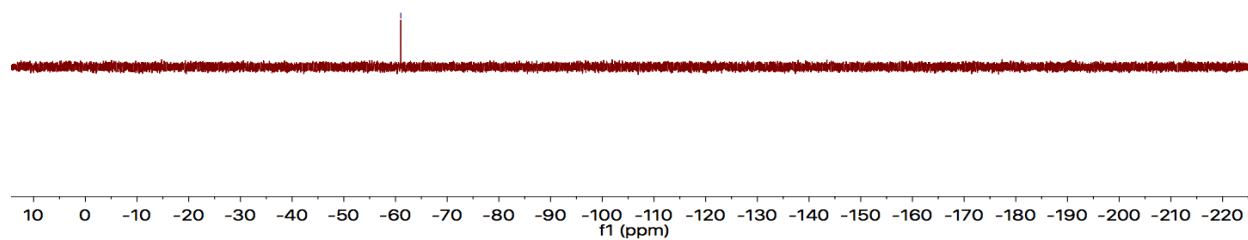

# <sup>1</sup>H Spectra for Compound 4

ndayal-SF5psych.1.fid

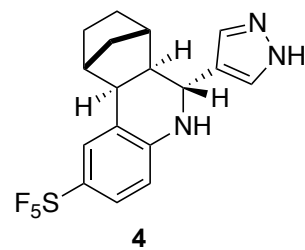

**4**

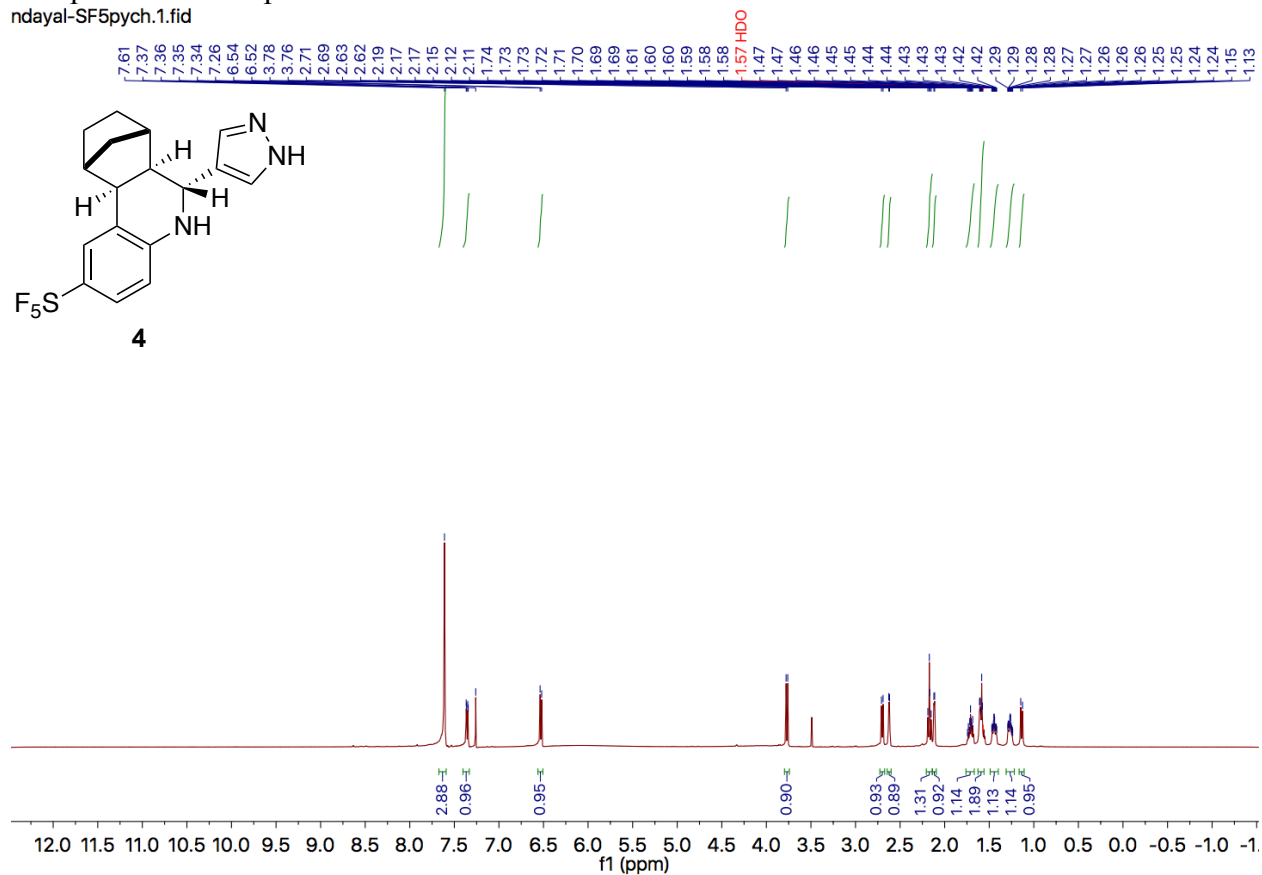

<sup>13</sup>C Spectra for Compound 4  
ndayal-SF5pych.2.fid

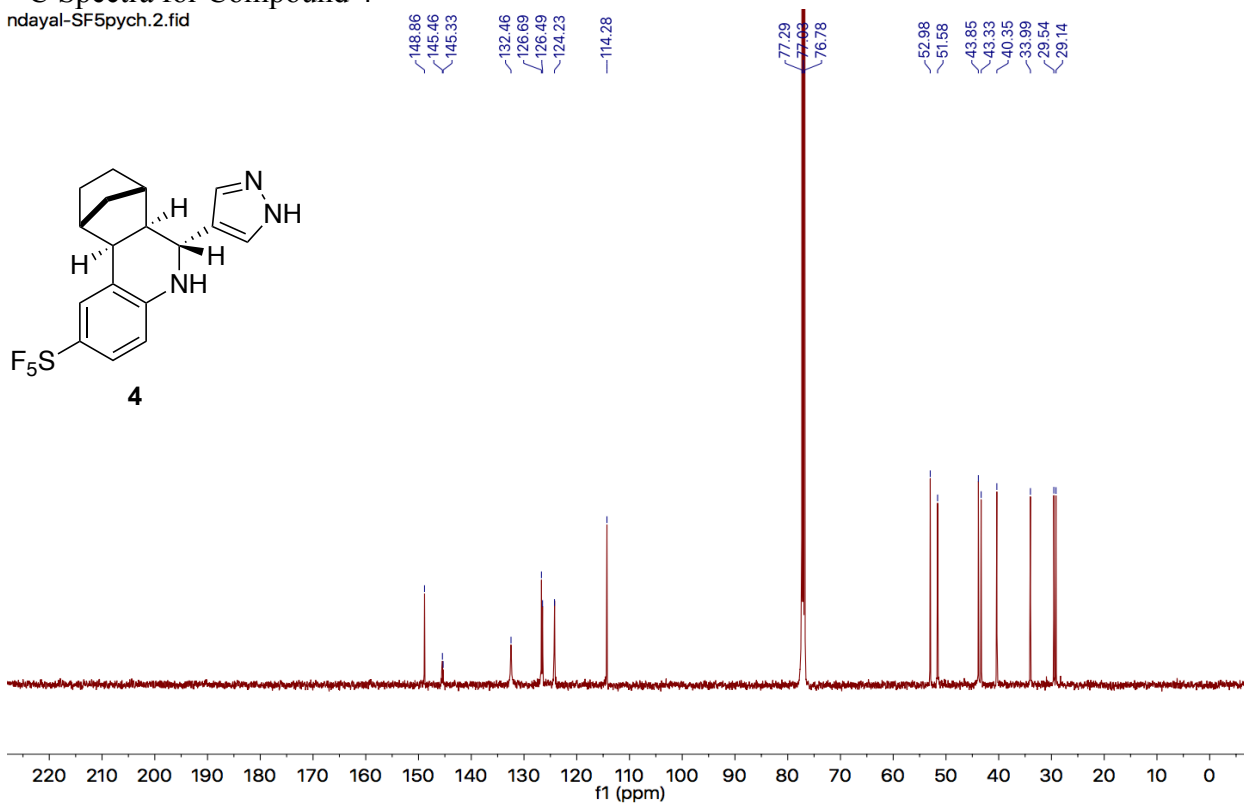

<sup>1</sup>H Spectra for Compound 5

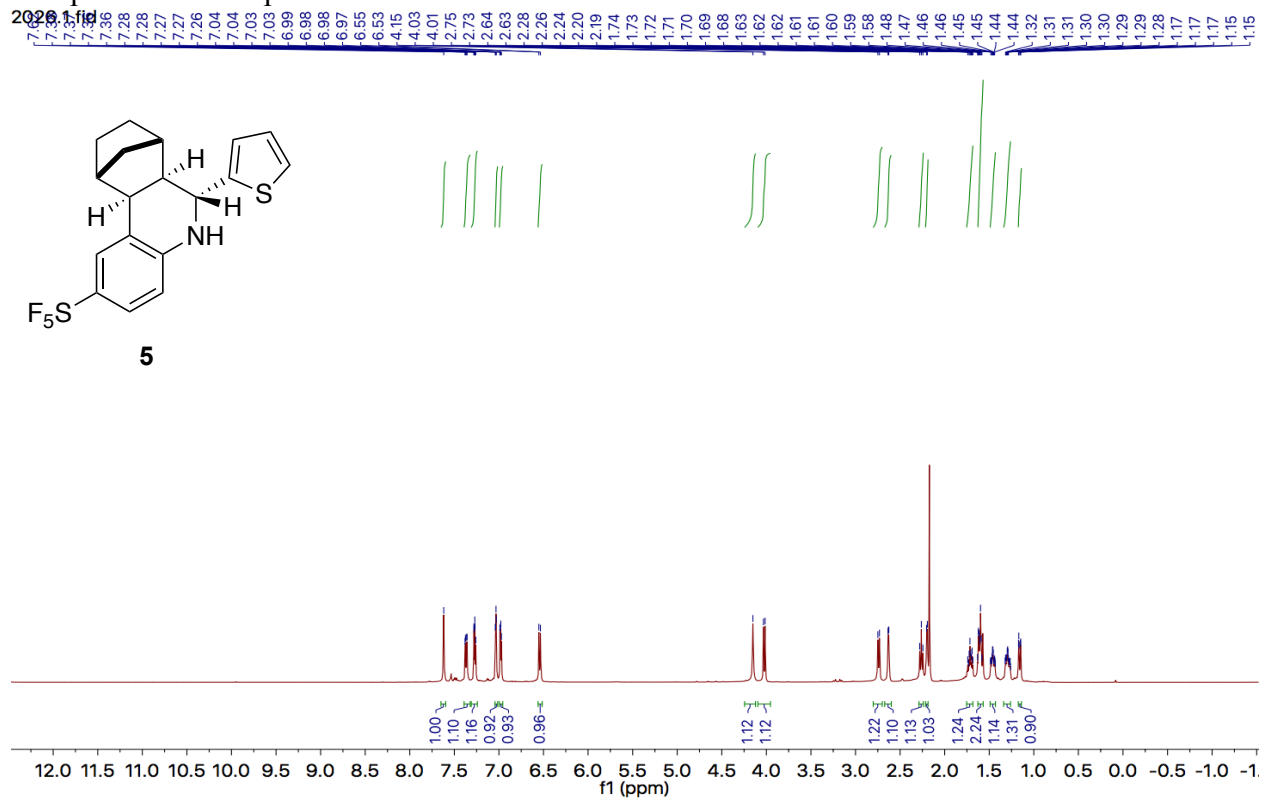

<sup>13</sup>C Spectra for Compound 5  
2026.2.fid

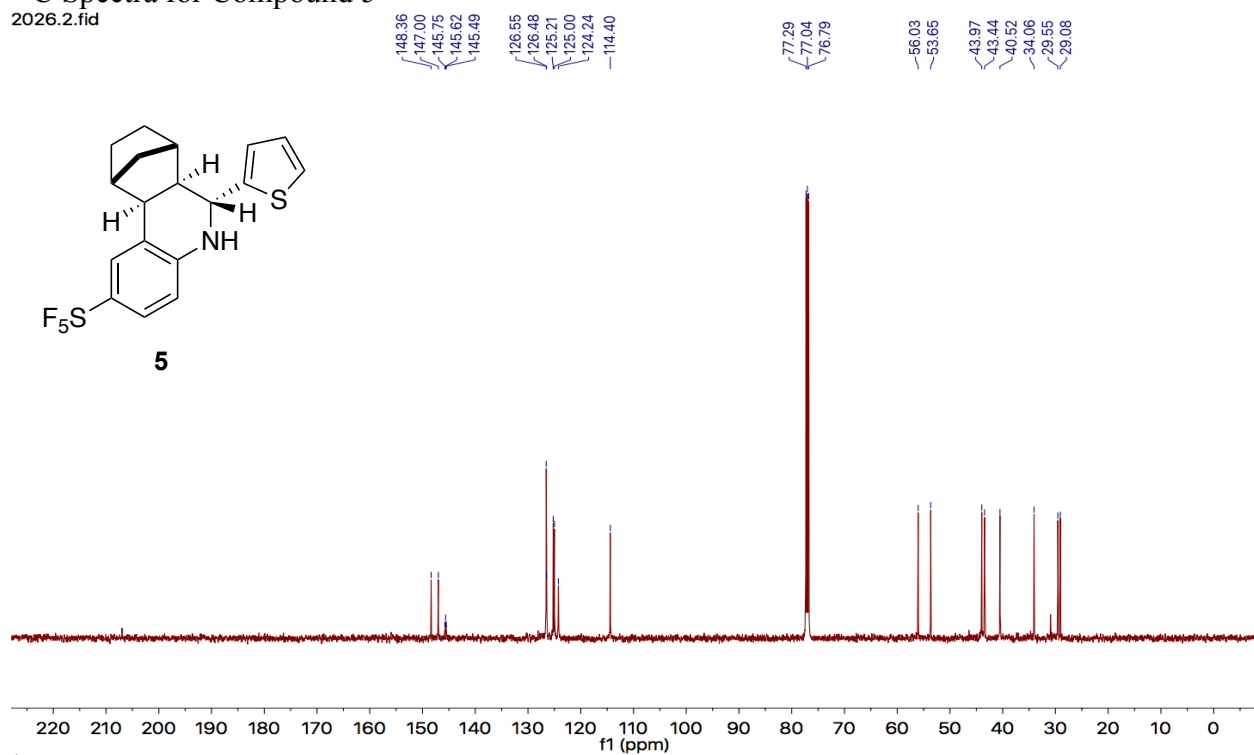

<sup>1</sup>H Spectra for Compound 6  
1940.1.fid

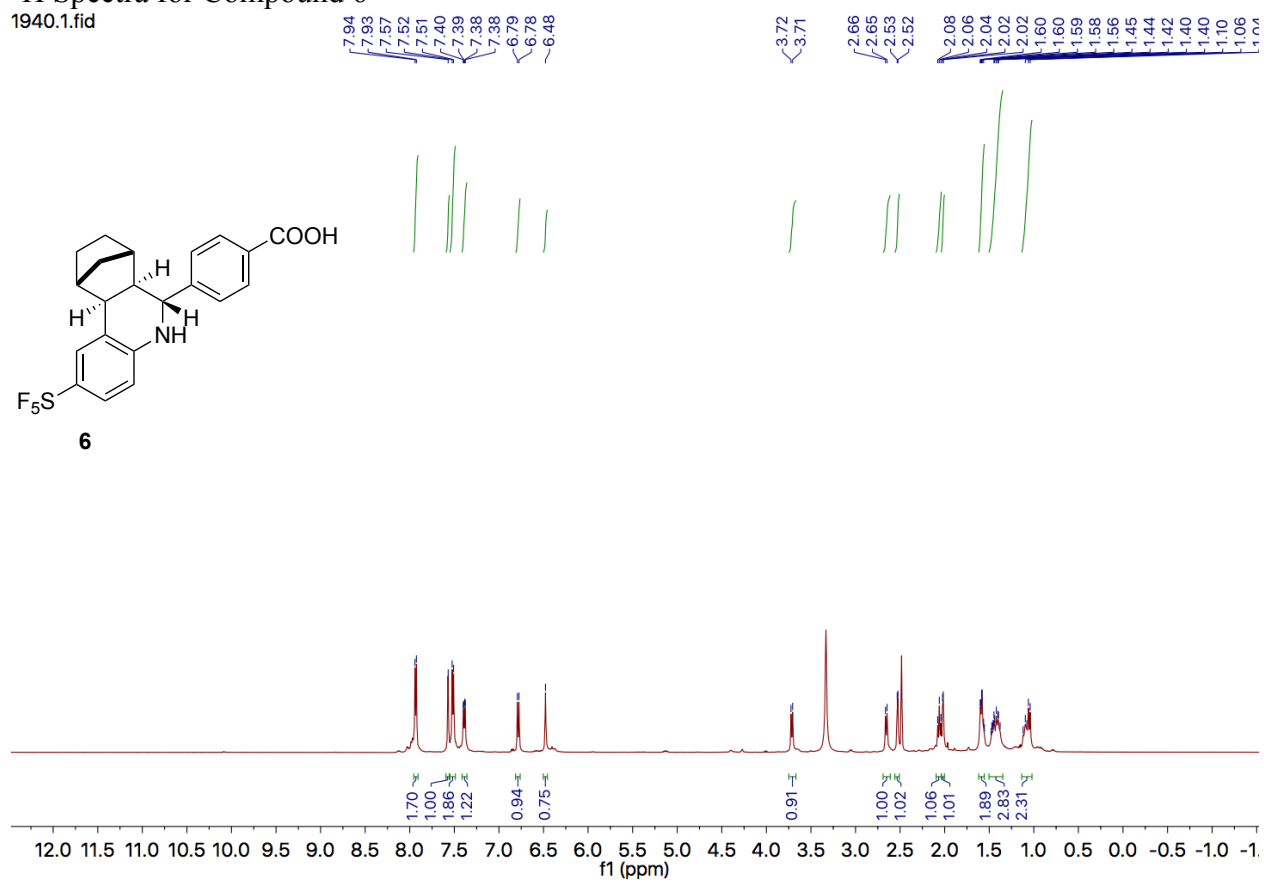

<sup>13</sup>C Spectra for Compound 6

1940.2.fid

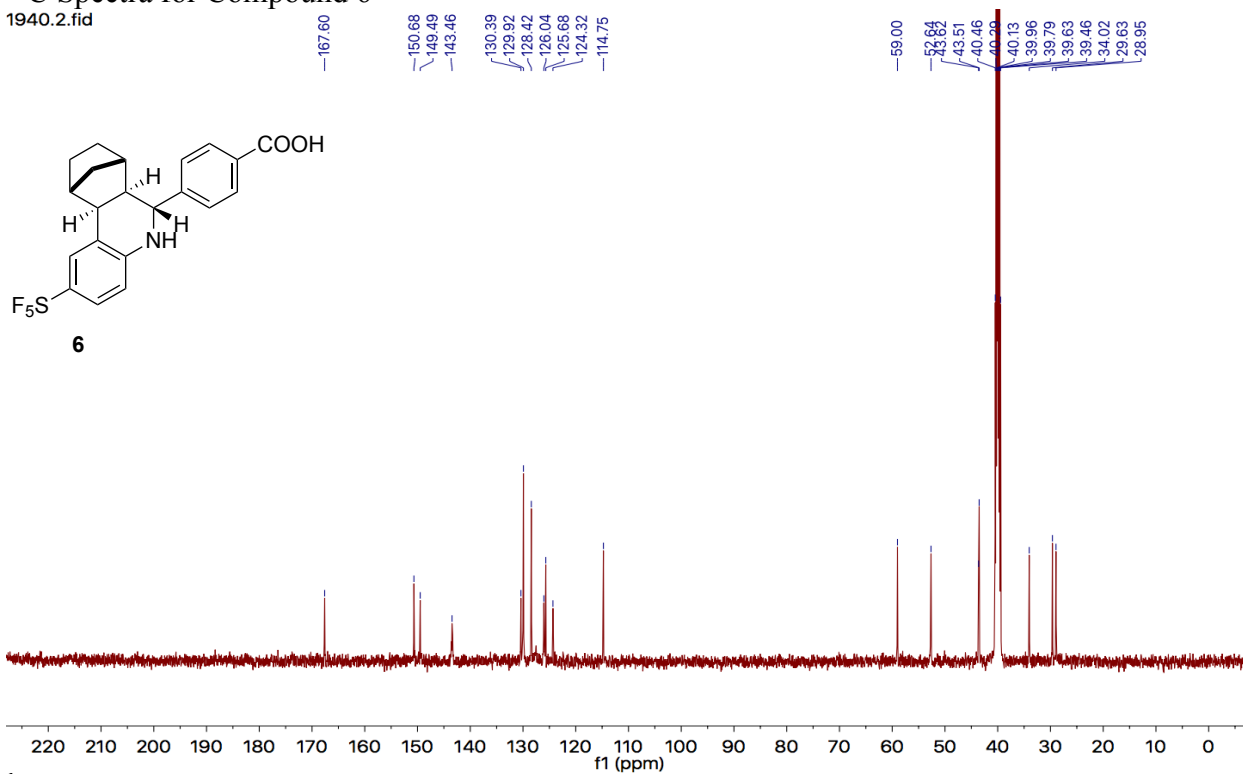

<sup>1</sup>H Spectra for Compound 7

1852.1.fid

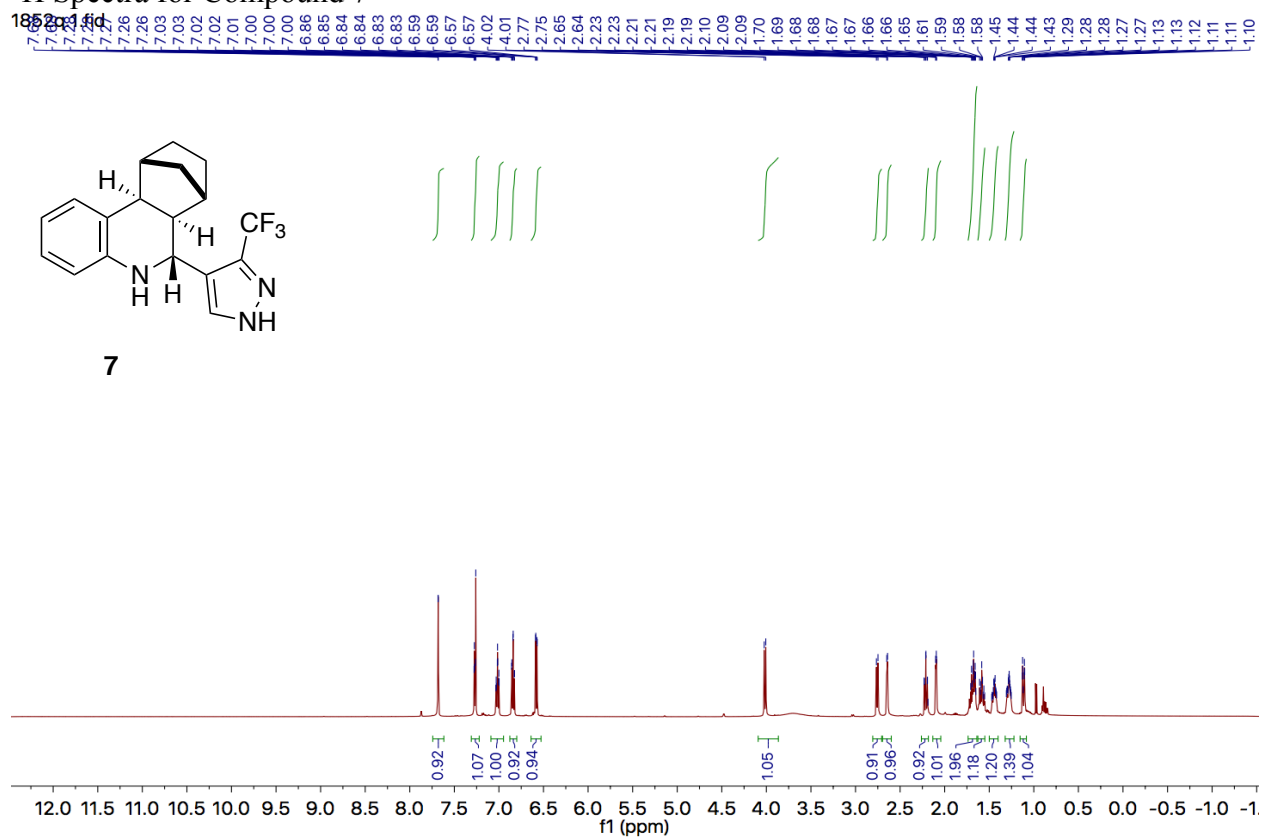



<sup>13</sup>C Spectra for Compound 7  
1852q.2.fid

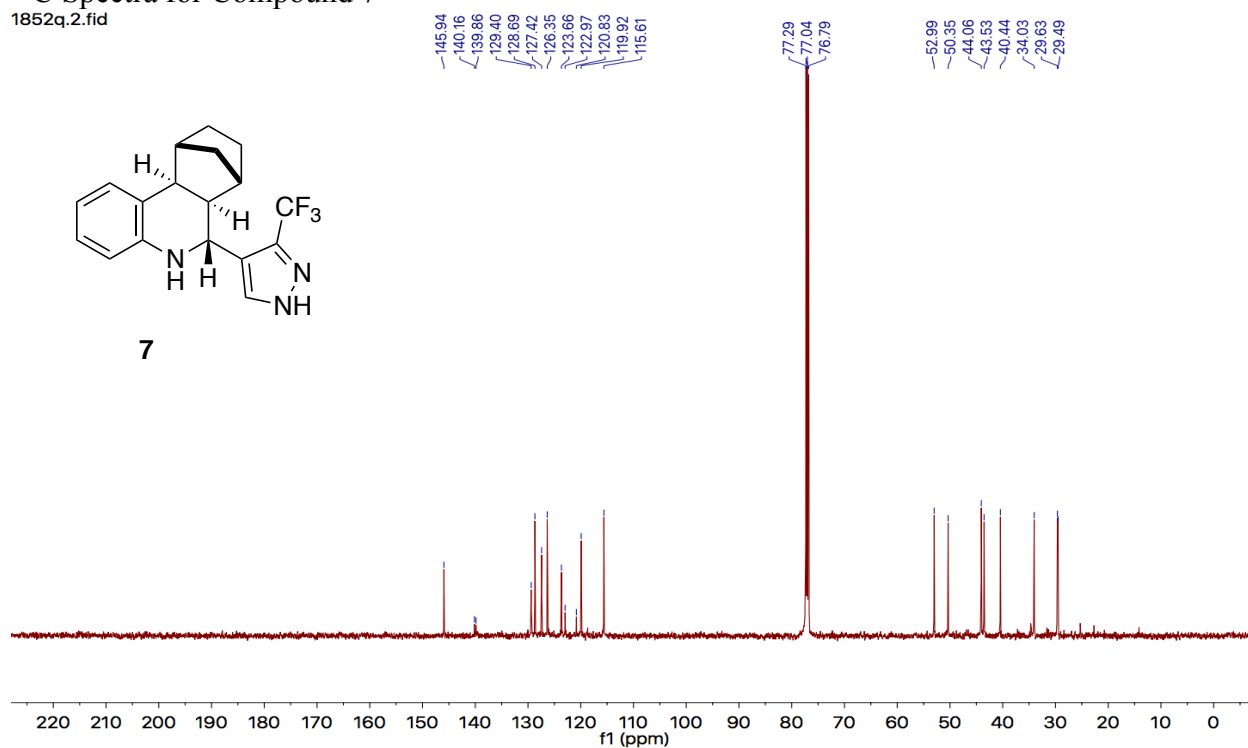

<sup>1</sup>H Spectra for Compound 8

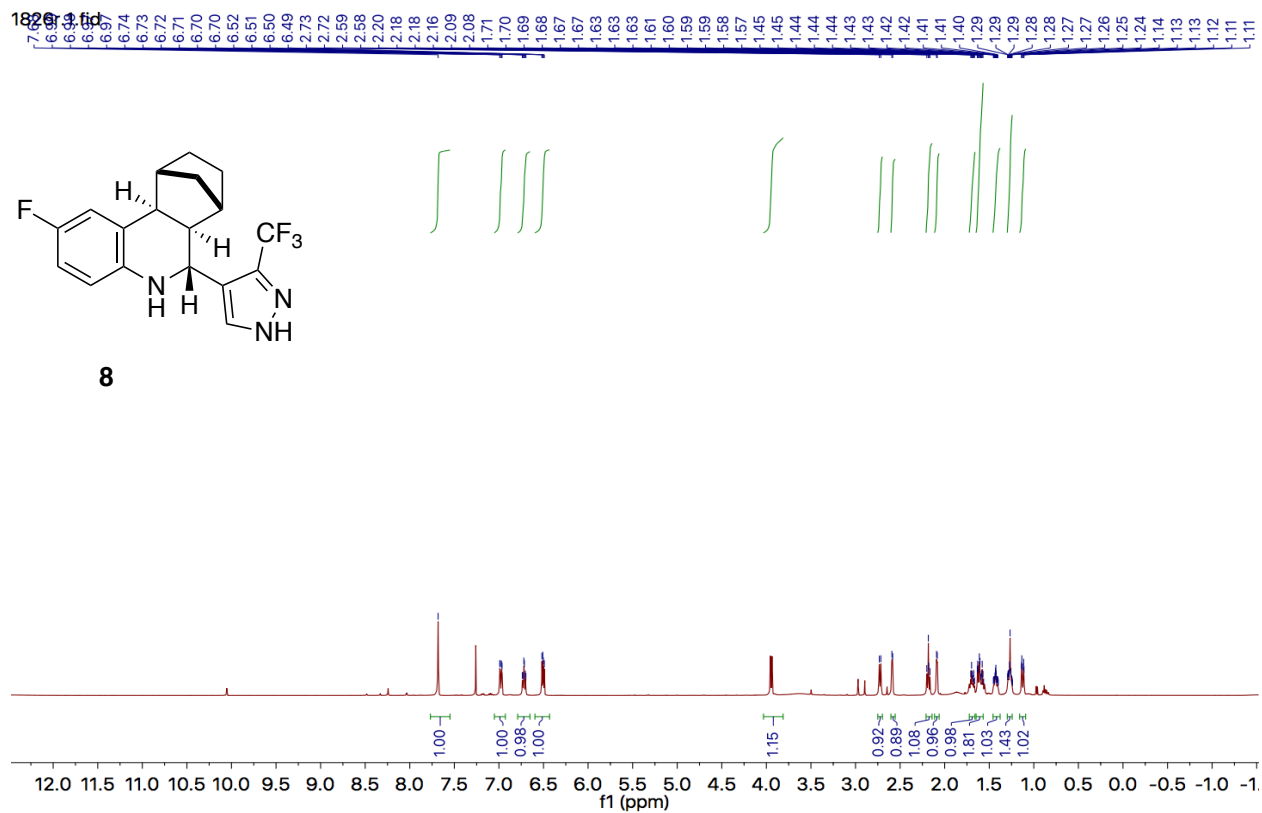

<sup>13</sup>C Spectra for Compound 8

1826r.2.fid

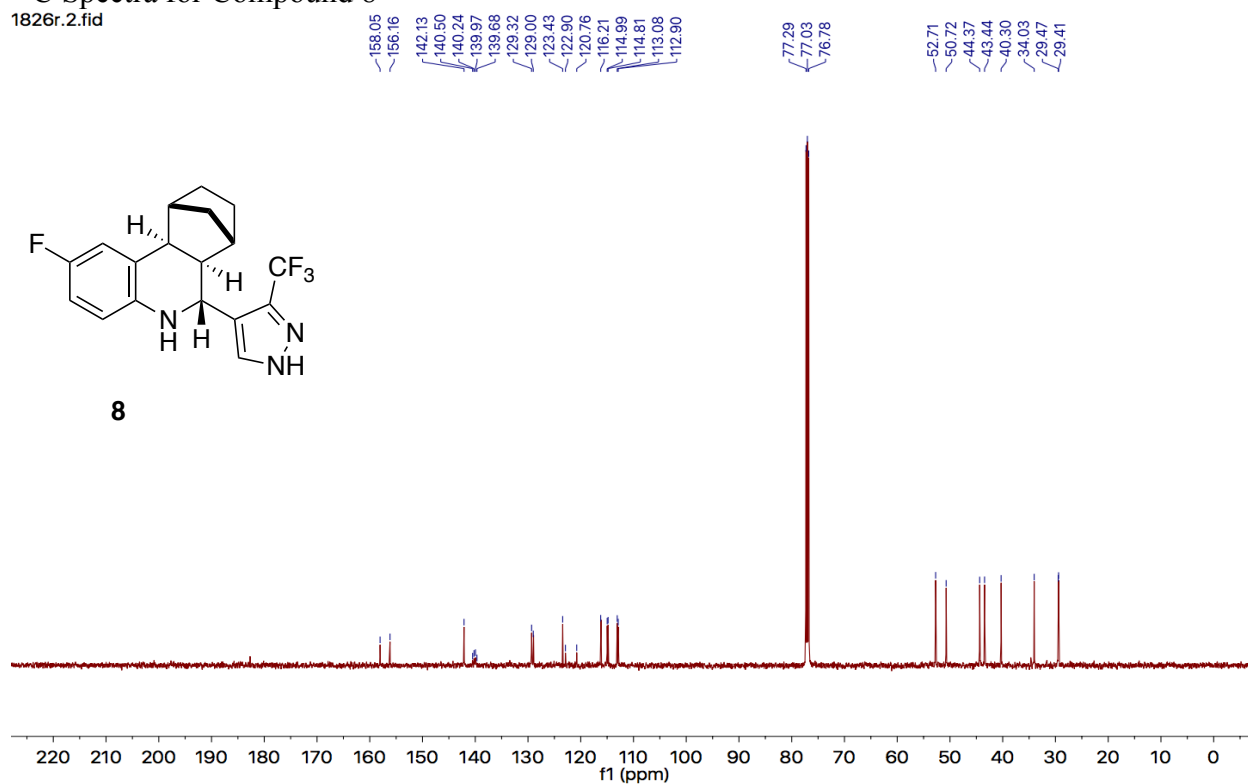

<sup>1</sup>H NMR Spectra for Compound 9

1790.1.fid

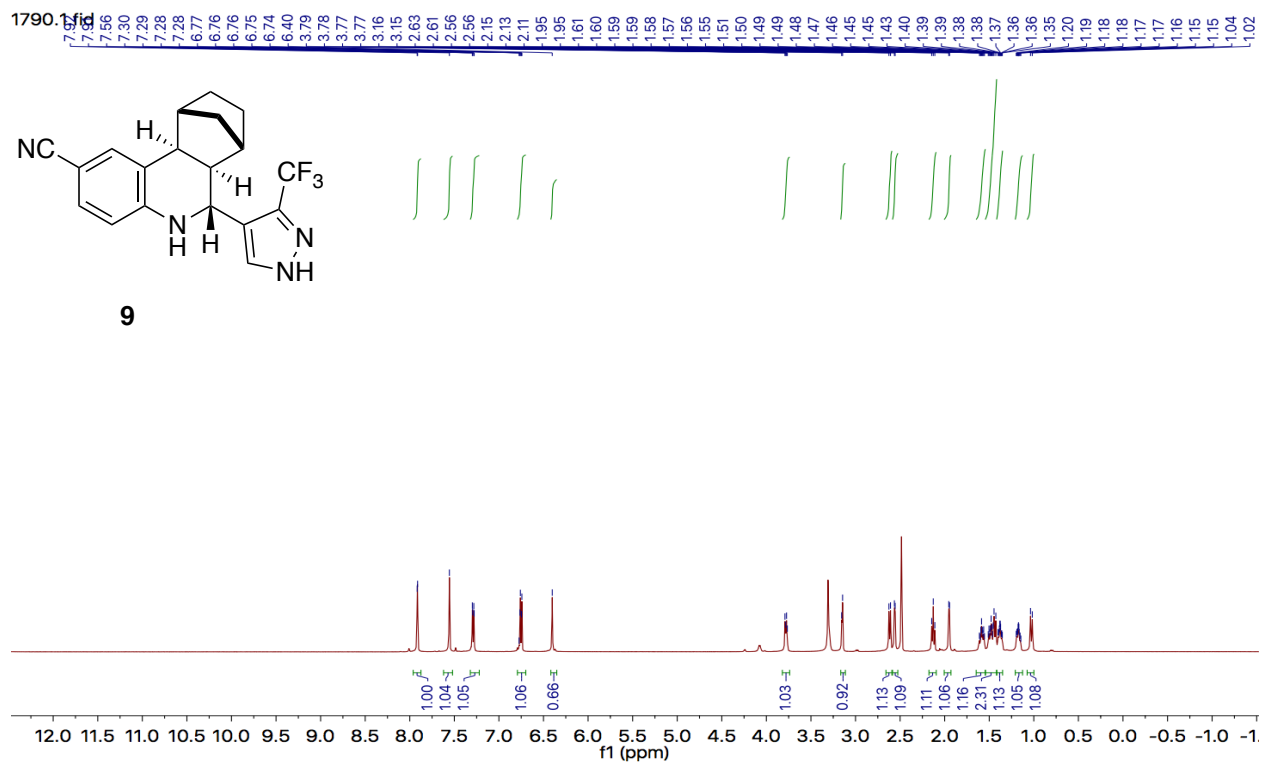

<sup>13</sup>C Spectra for Compound 9  
1790.2.fid

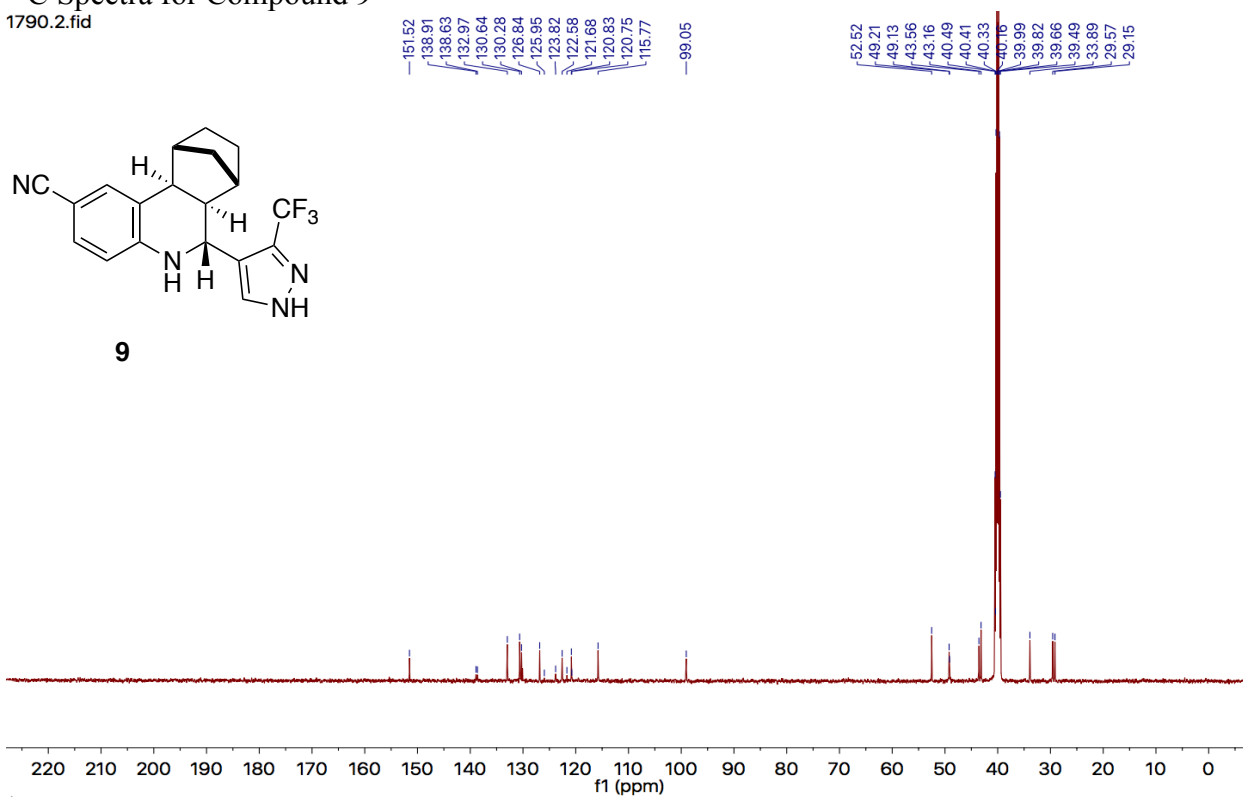

<sup>1</sup>H Spectra for Compound 10  
1933.1.fid

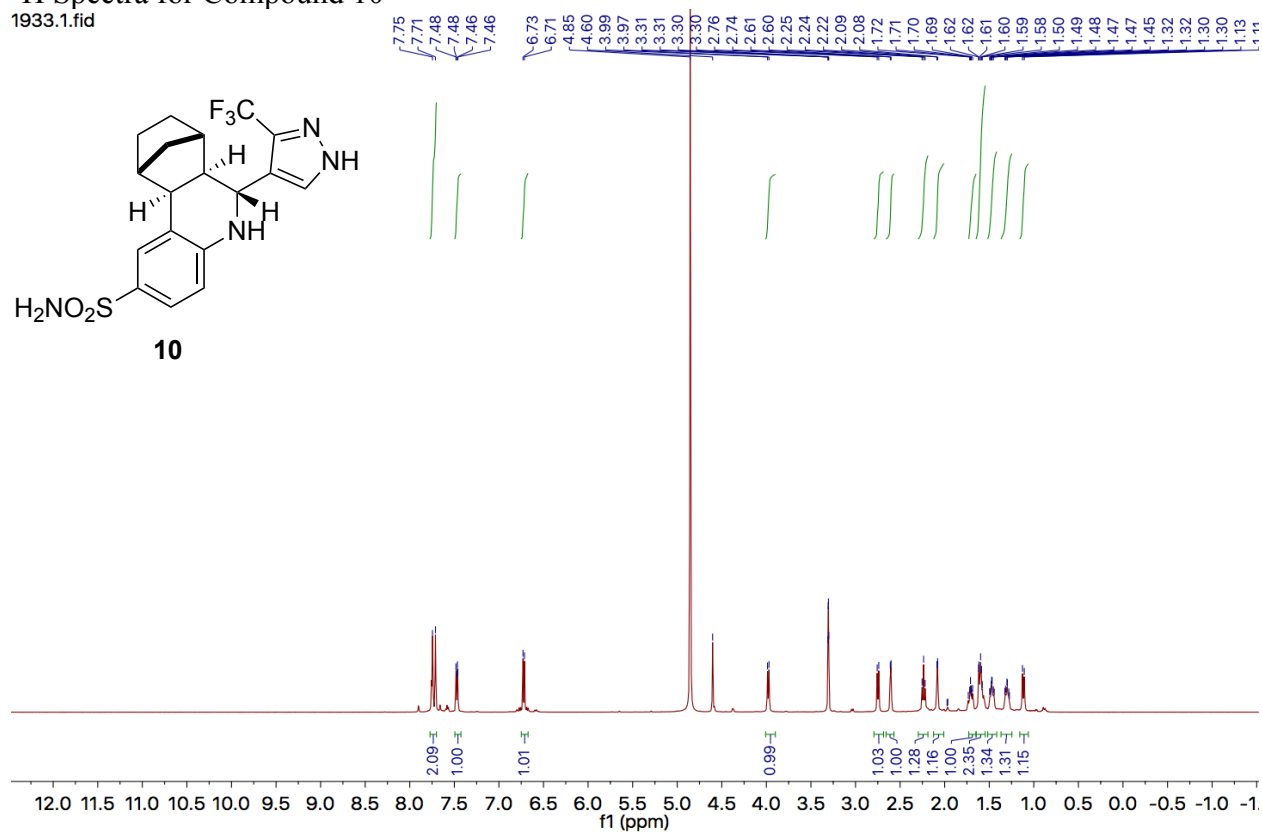

<sup>13</sup>C Spectra for Compound 10  
1933.2.fid

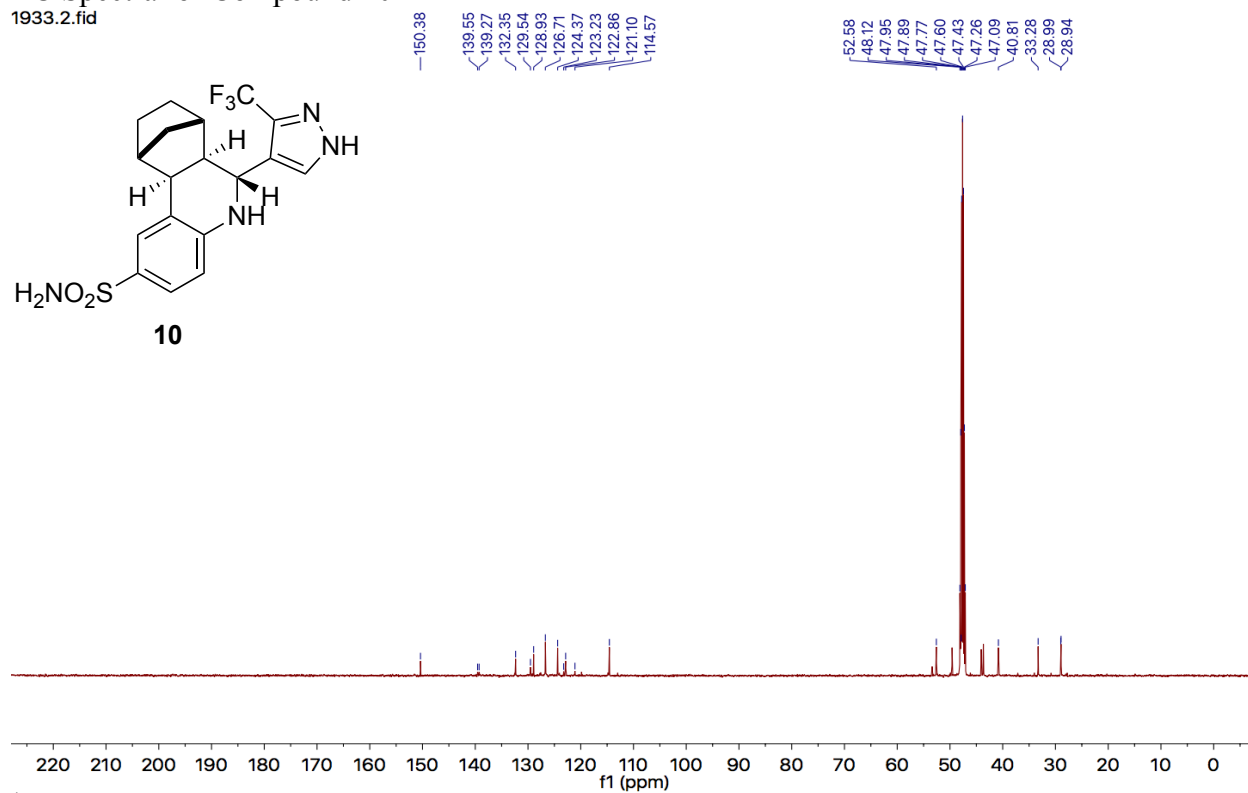

<sup>1</sup>H Spectra for Compound 11

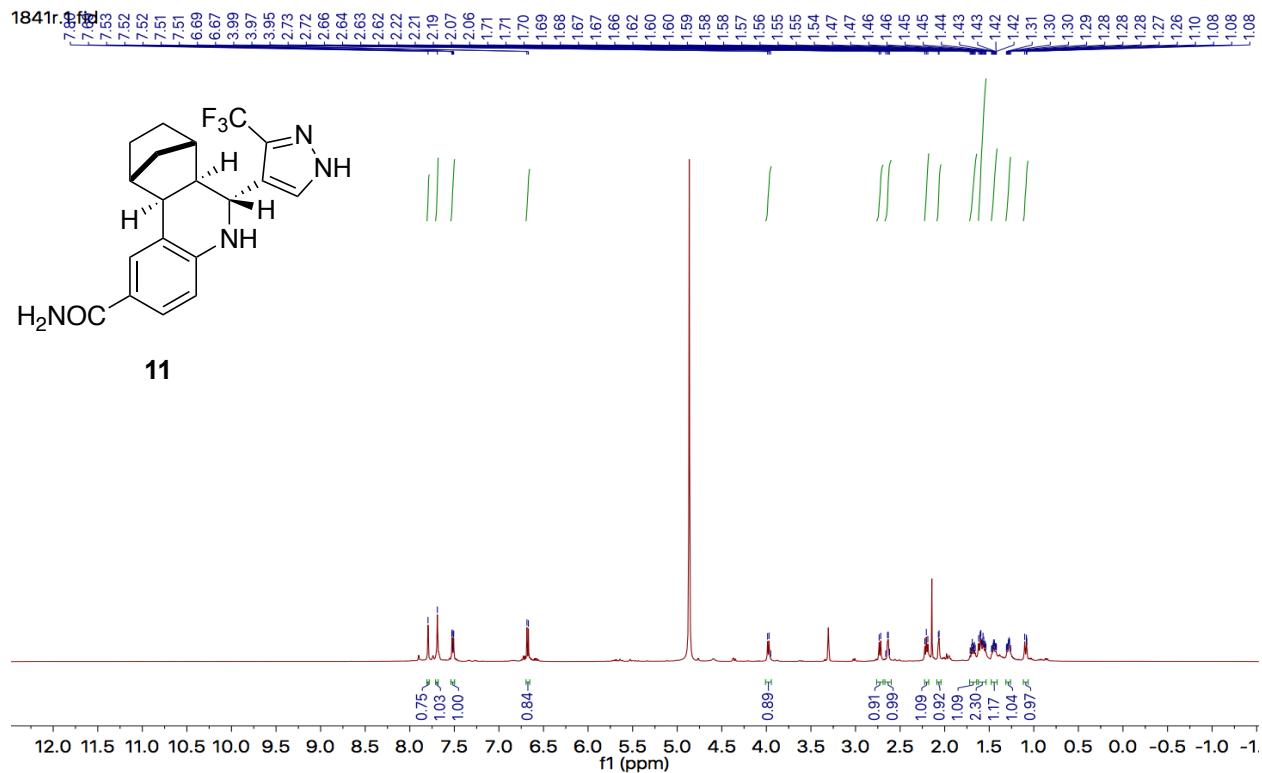

<sup>13</sup>C Spectra for Compound 11  
1841r.2.fid

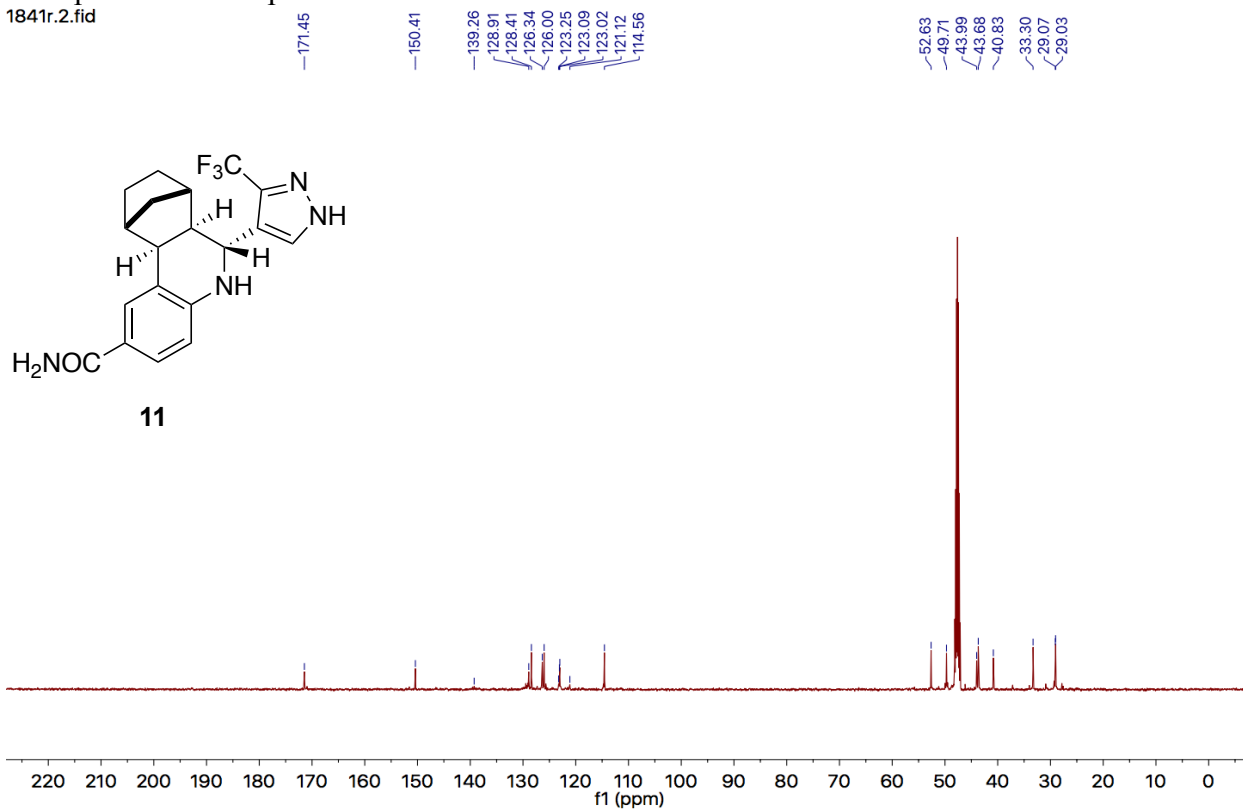

<sup>1</sup>H Spectra for Compound 12

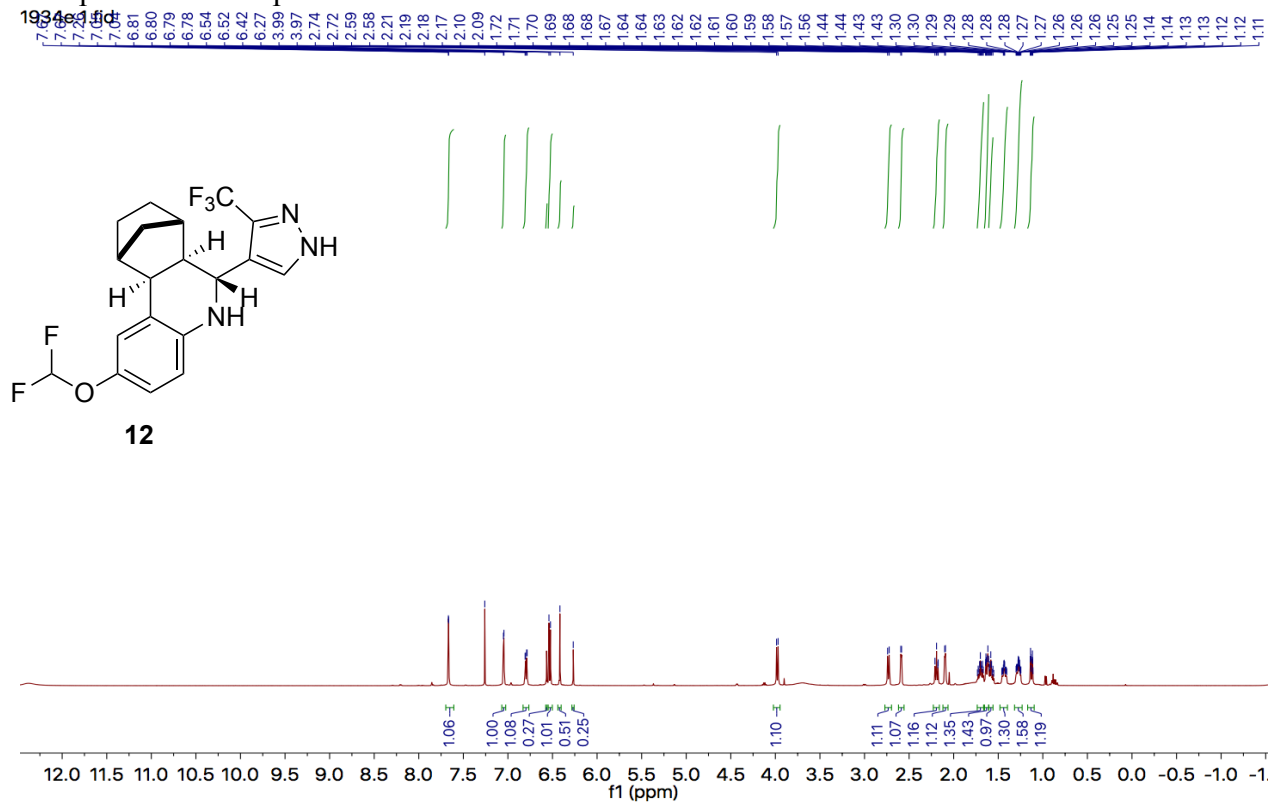

<sup>13</sup>C Spectra for Compound 12  
1934e.2.fid

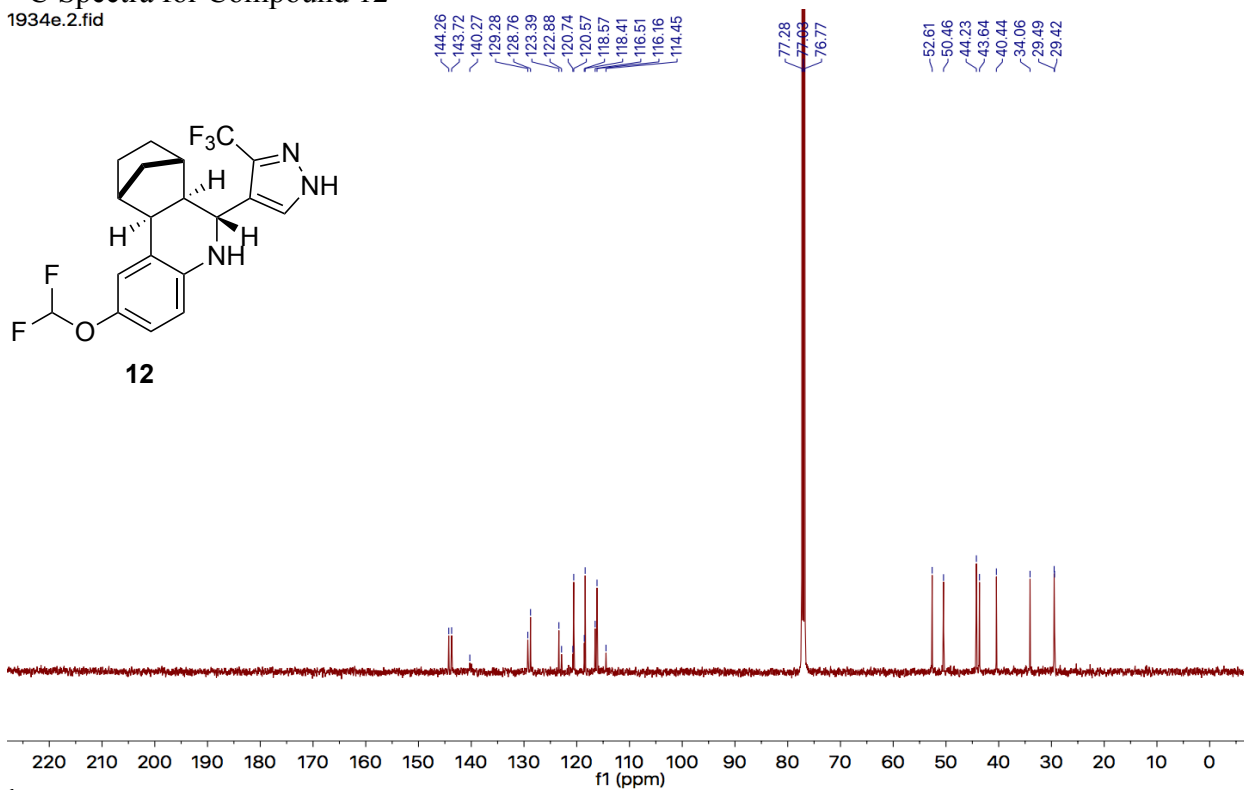

<sup>1</sup>H Spectra for Compound 13  
ndayal-1908.4.fid

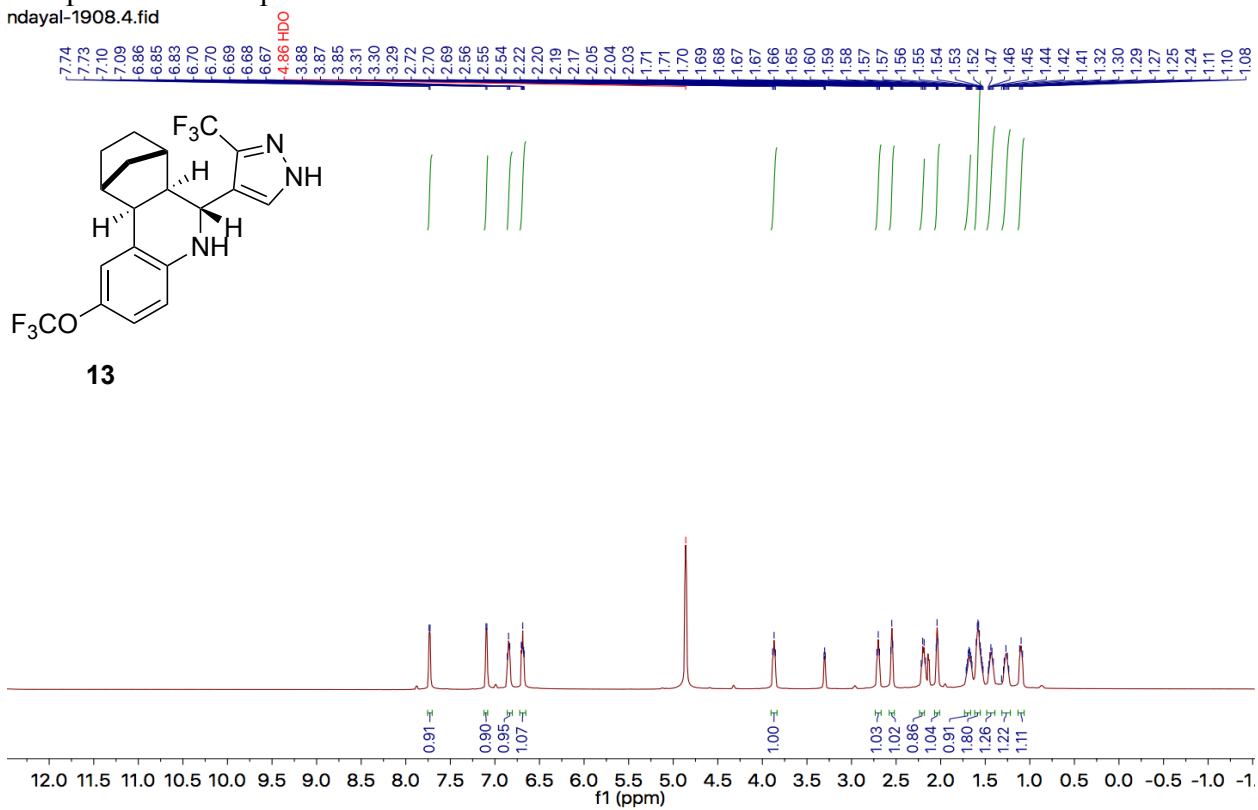

<sup>13</sup>C Spectra for Compound 13  
1908.2.fid

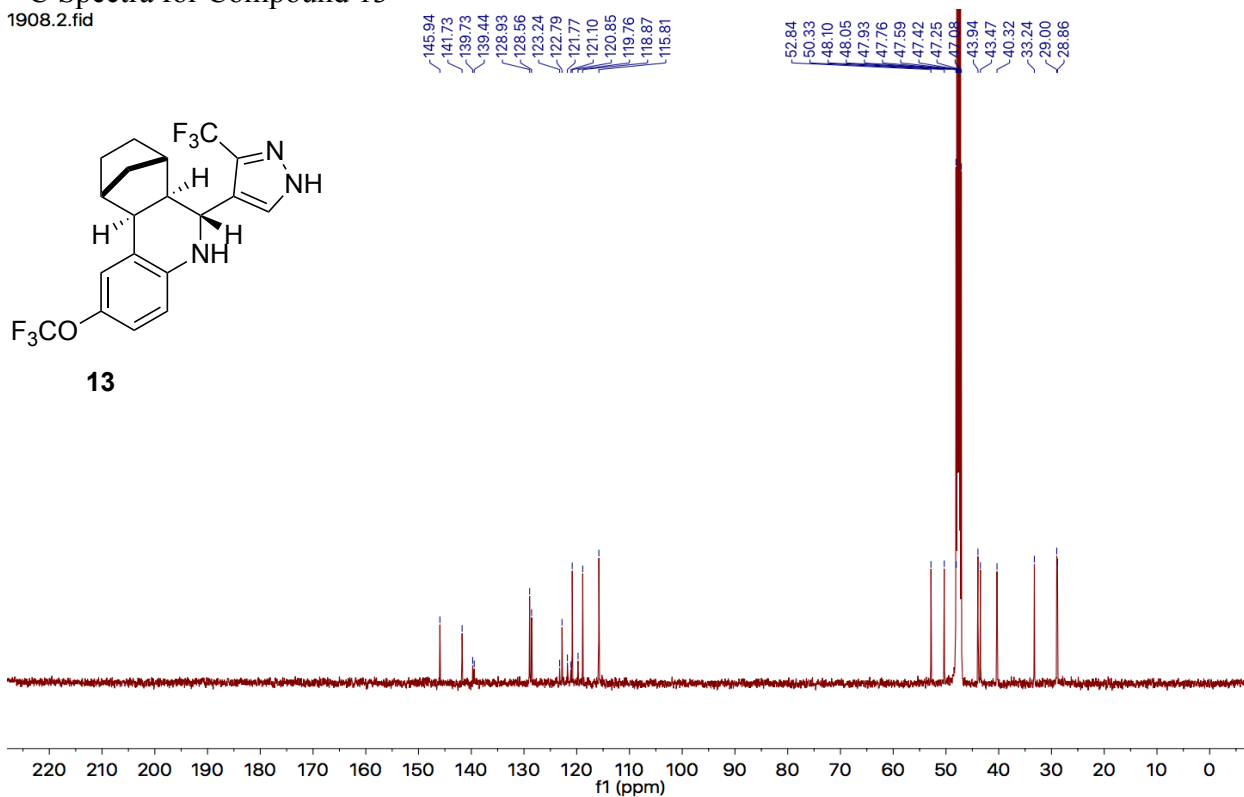

<sup>1</sup>H Spectra for Compound 14  
1907.1.fid

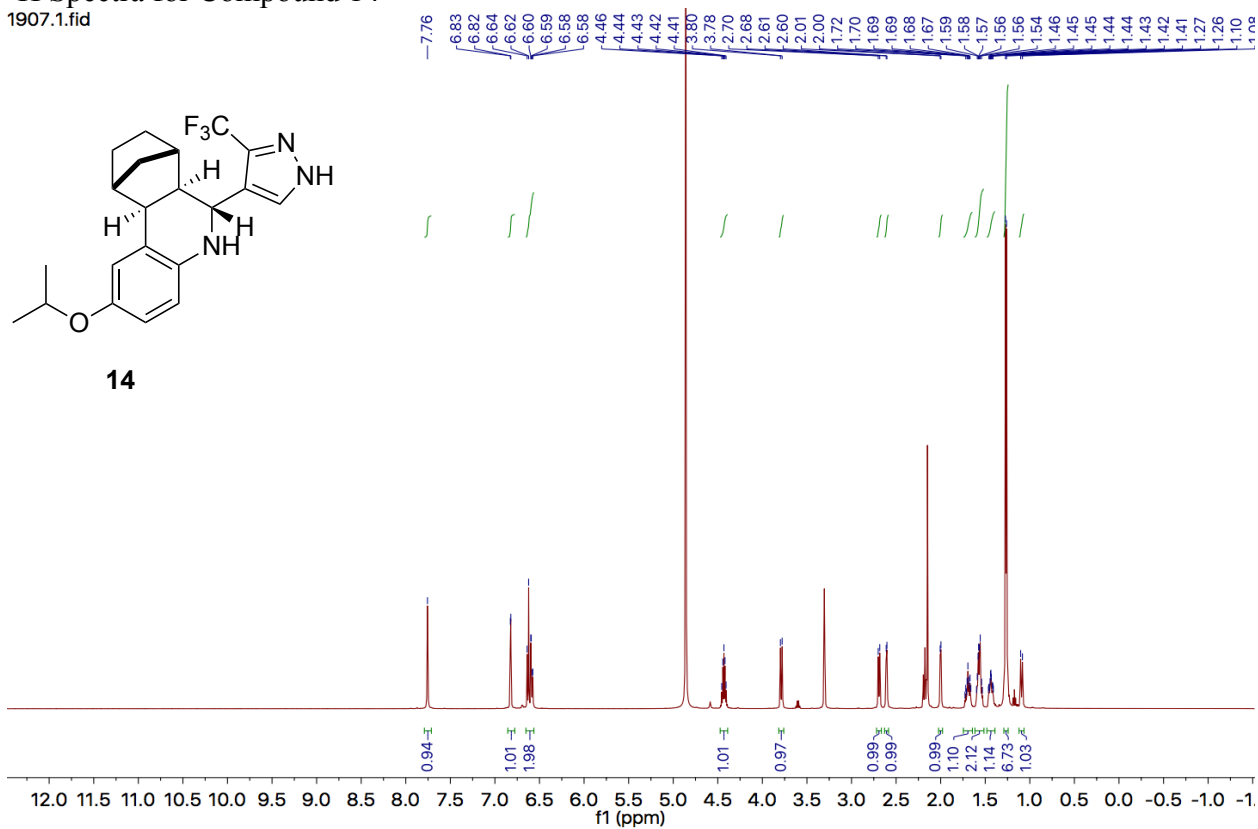

<sup>13</sup>C Spectra for Compound 14  
1907.2.fid

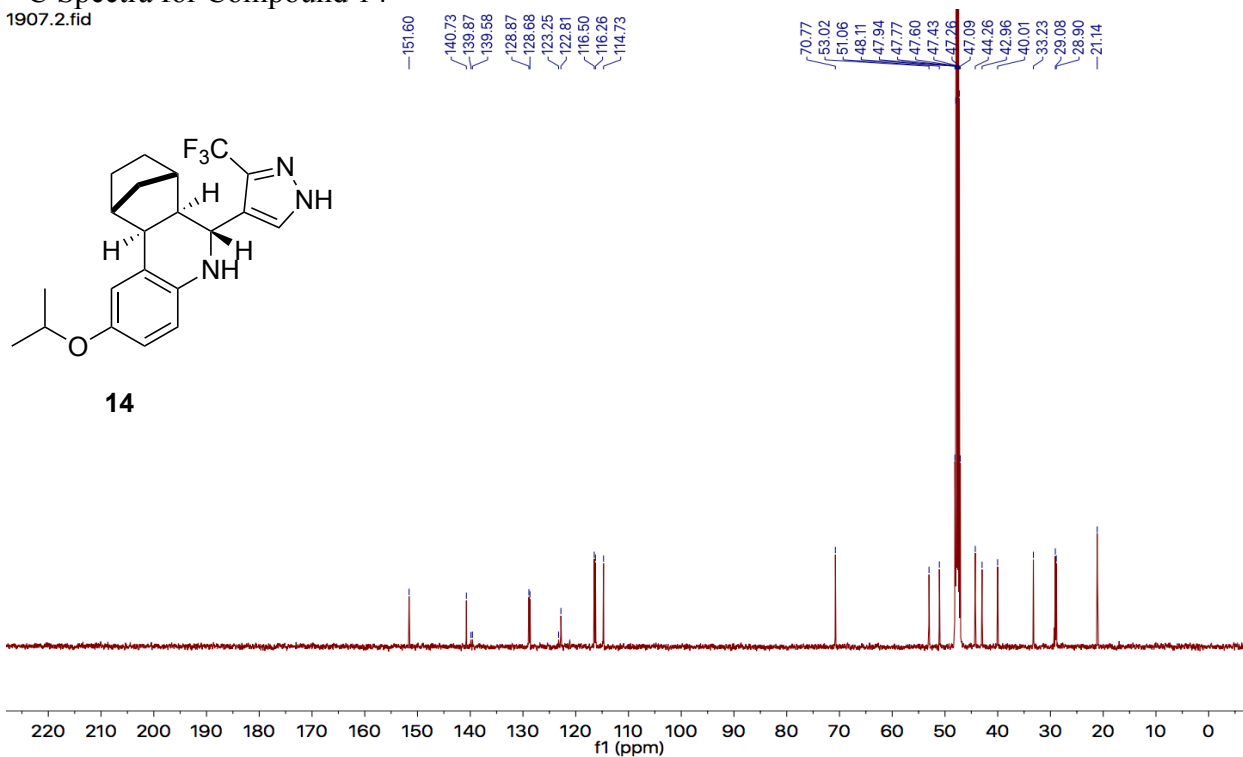

<sup>1</sup>H Spectra for Compound 15  
1862.1.fid

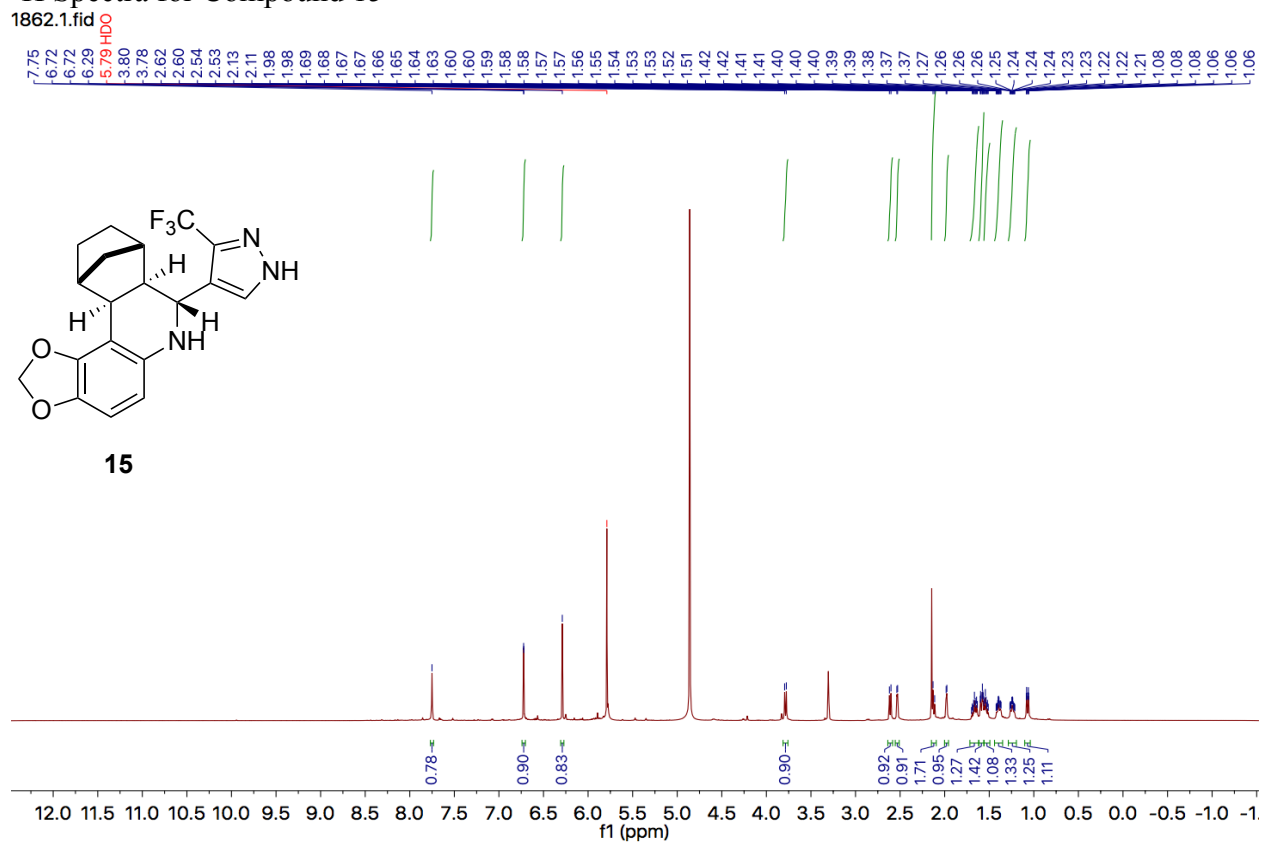



<sup>13</sup>C Spectra for Compound 15  
1862.2.fid

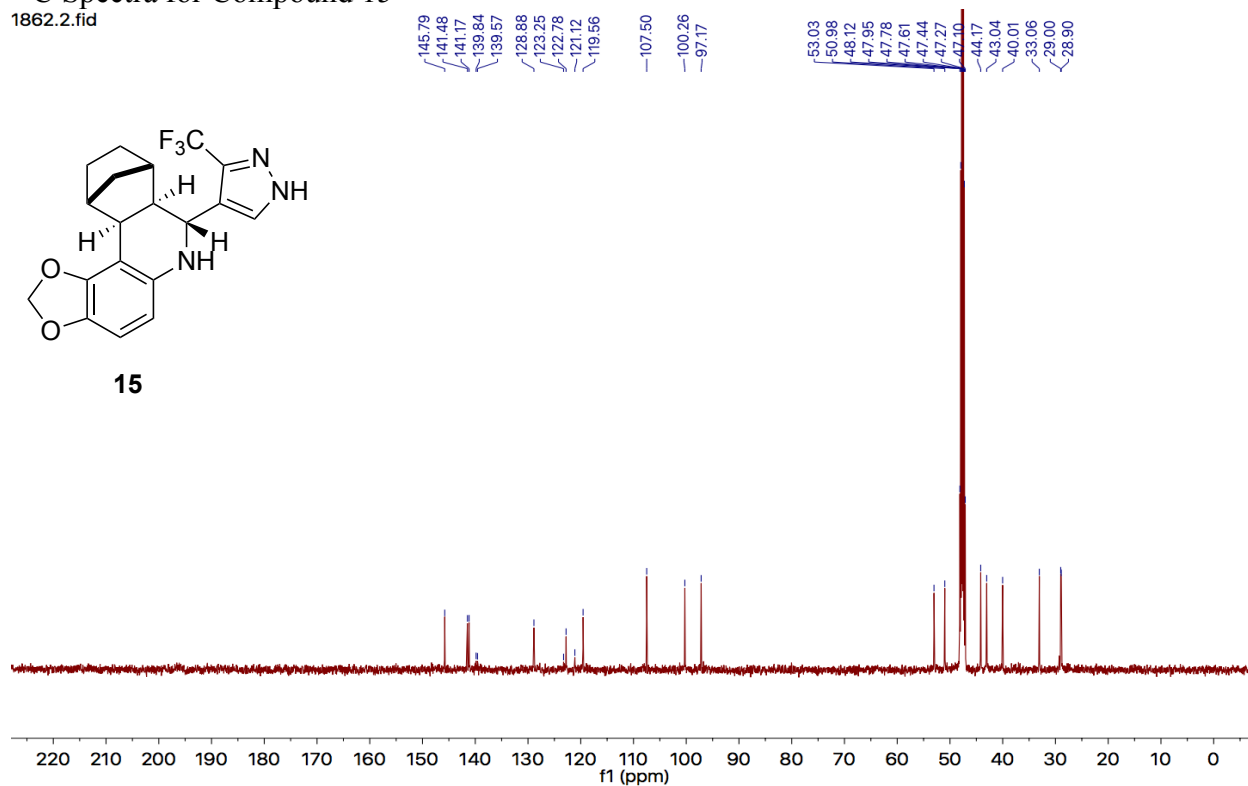

<sup>1</sup>H Spectra for Compound 16  
ndayal-e1905.1.fid

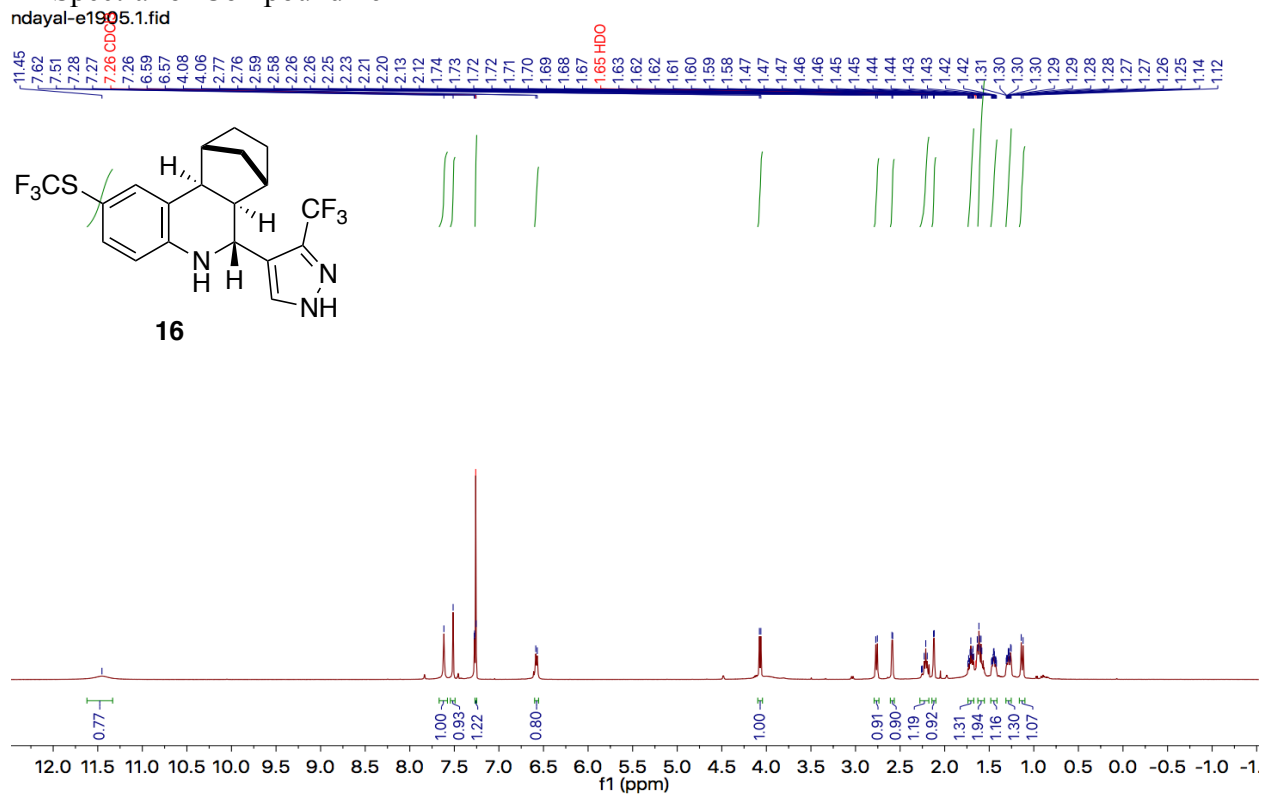

# <sup>13</sup>C Spectra for Compound 16

ndayal-e1905.5.fid

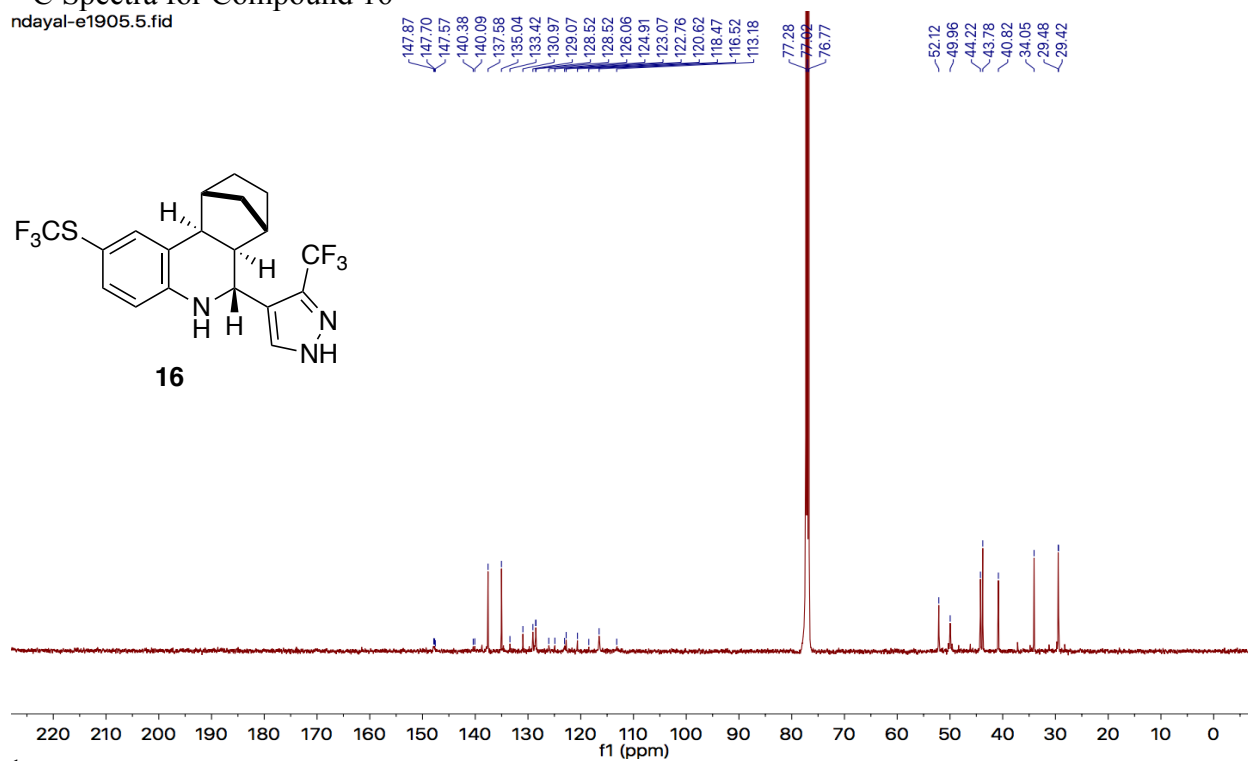

# <sup>1</sup>H Spectra for Compound 17

1924.1.fid

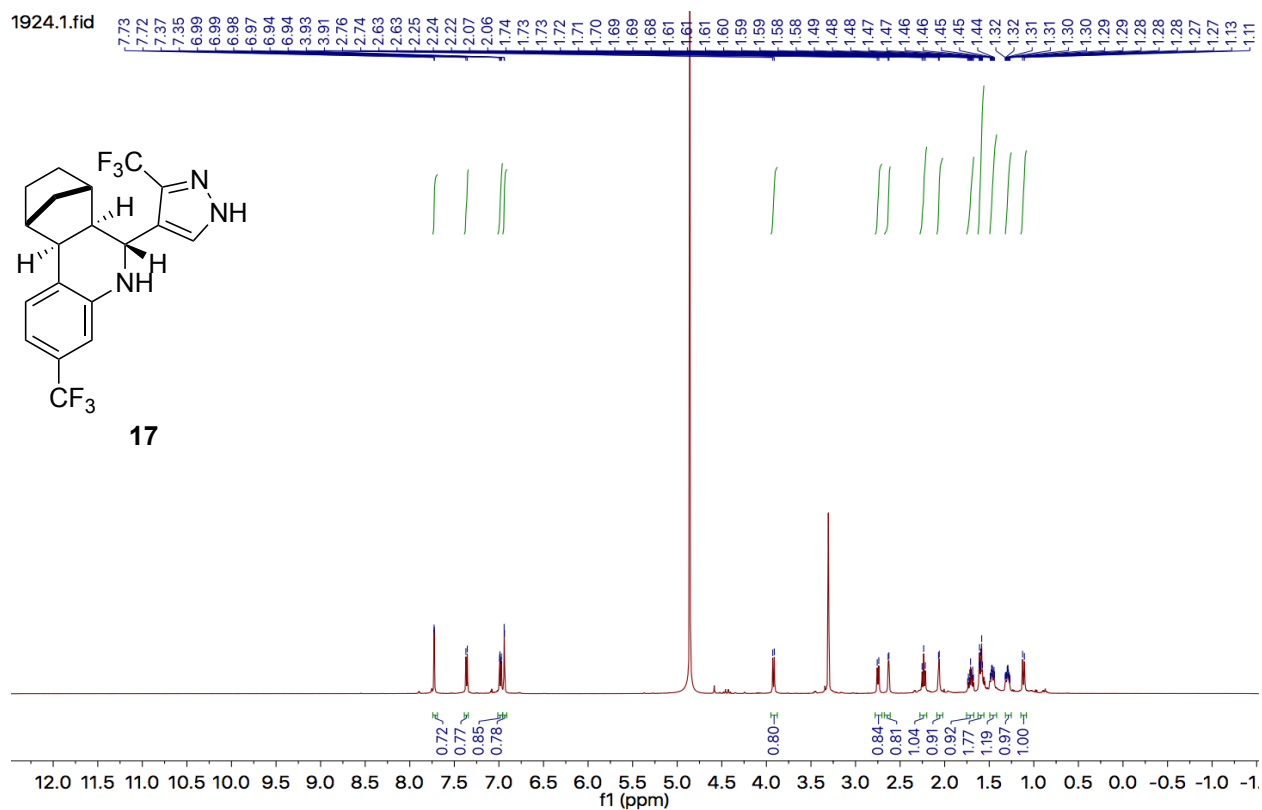

<sup>13</sup>C Spectra for Compound 17

1924.2.fid

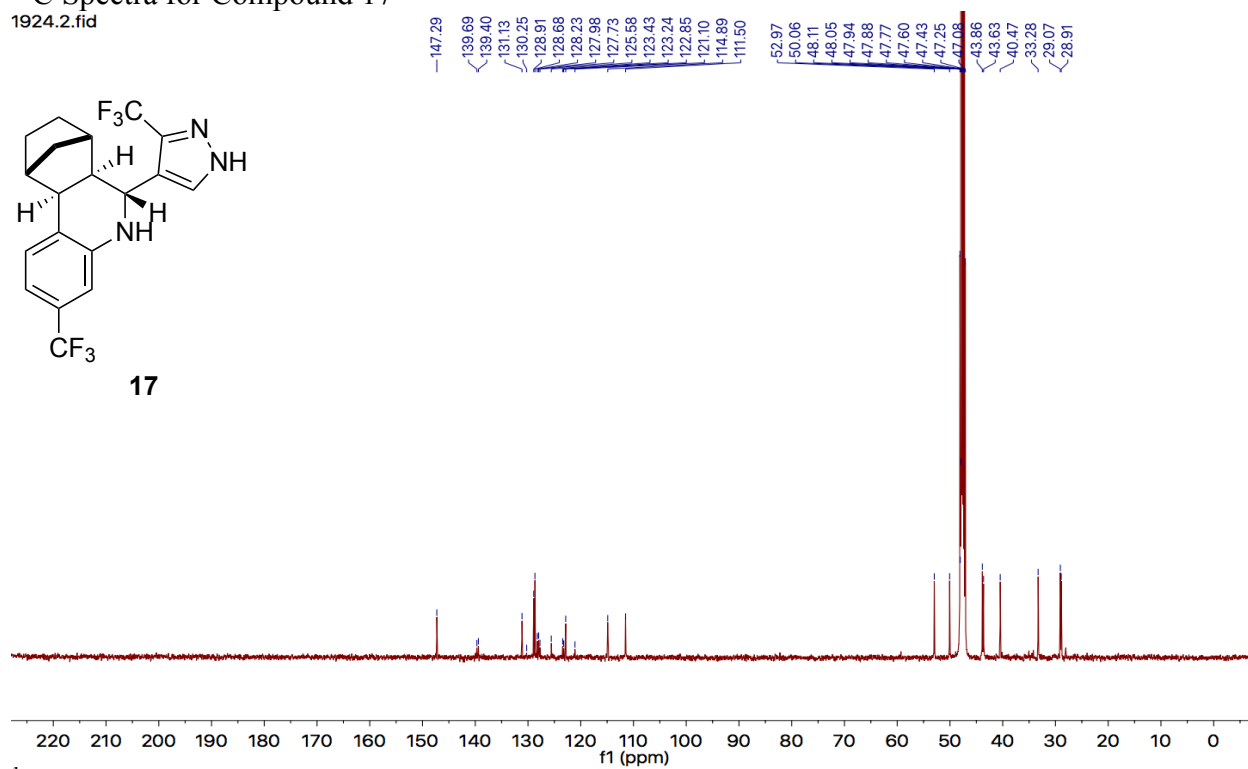

<sup>1</sup>H Spectra for Compound 18

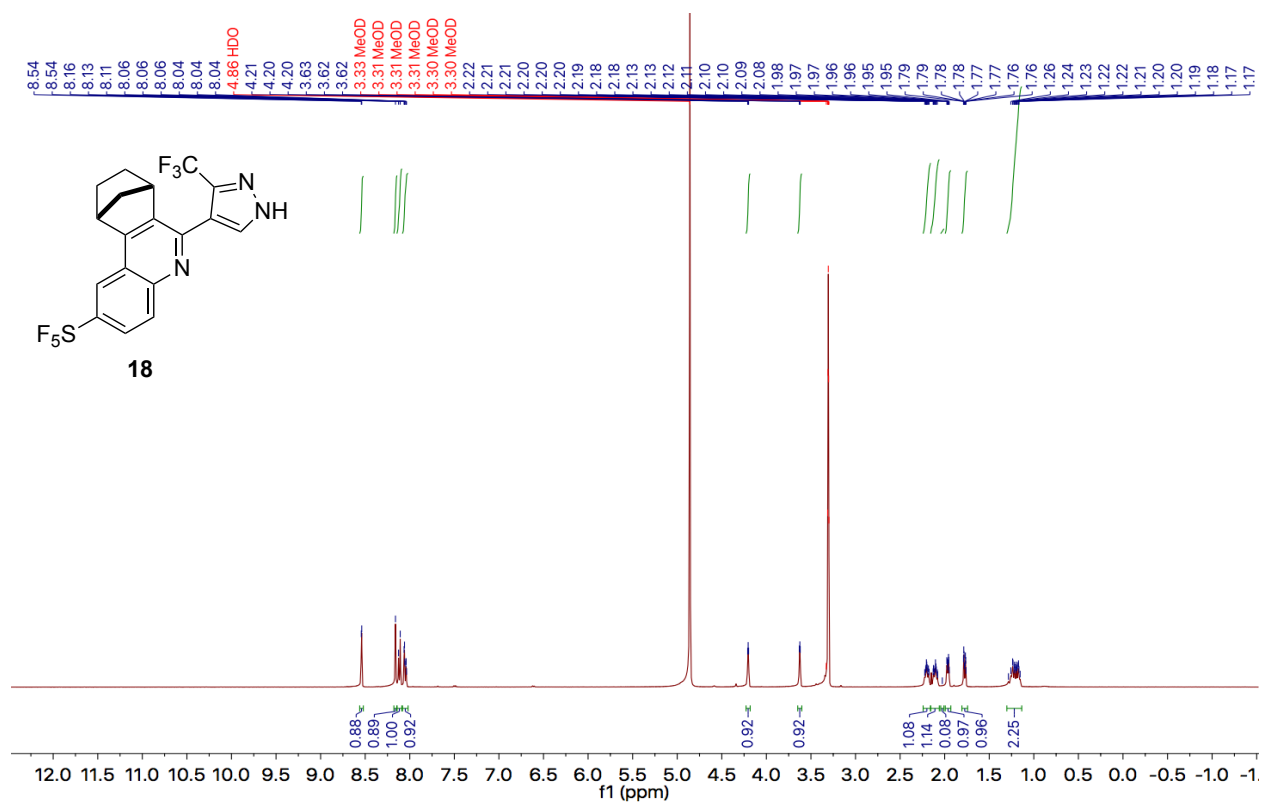

# <sup>13</sup>C Spectra for Compound 18

ndayal-e1835ox.2.fid

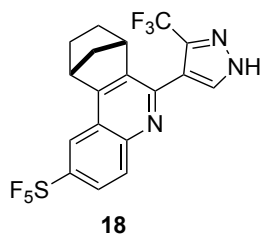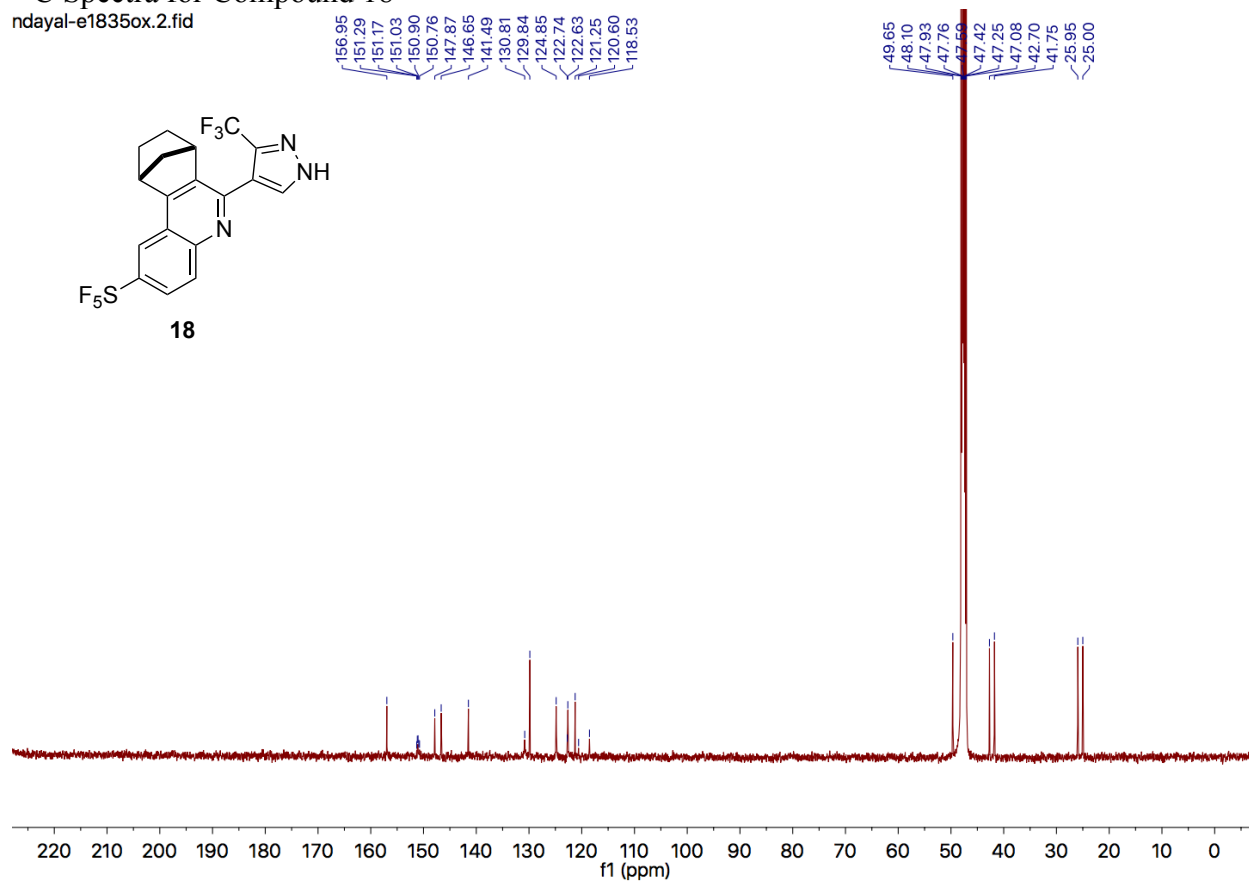

Supplement: d1md00211b1.pdf [file d1md00211b1.pdf]
